# Supplementary material for: A novel faecal Lachnoclostridium marker for the non-invasive diagnosis of colorectal adenoma and cancer
Source: PubMed Central journal article supplement — Gut. 2019 Nov 27;69(7):1248–57. doi: 10.1136/gutjnl-2019-318532 (PMC7306980; doi:10.1136/gutjnl-2019-318532), 2019-11-27
Supplement: gutjnl-2019-318532supp001.pdf [file gutjnl-2019-318532supp001.pdf]

Supplementary table 1. Fecal abundances of the 20 CRC-associated bacterial gene markers by metagenome sequencing

| #  | sequer  | sample_nstudy_id | group             | 370640  | 482585  | 1704941 | 2736705 | 3246804 | 1696299 | 2040133 | 2361423 | 3173495 | 181682  | 3531210 | 3976414 | 2211919 | 1804565 | 2206475 | 1559769 | 4256106 | 3611706 | 3319526 | 4171064 |
|----|---------|------------------|-------------------|---------|---------|---------|---------|---------|---------|---------|---------|---------|---------|---------|---------|---------|---------|---------|---------|---------|---------|---------|---------|
| 1  | ERS848f | M2-PK00f         | yu2015_16 CRC     | 0       | 0       | 0       | 0       | 0.05134 | 11.828  | 3.39682 | 107.763 | 87.0463 | 0.45763 | 0       | 13.4009 | 1.02976 | 7.76767 | 0       | 37.2947 | 0.49503 | 0.27413 | 28.8815 | 3.47407 |
| 2  | ERS848f | M122A            | yu2015_16 CRC     | 0       | 0.49406 | 3.46143 | 0       | 0       | 3.66237 | 22.5734 | 29.8174 | 28.3565 | 0.24953 | 0       | 12.6294 | 0.46726 | 8.74579 | 1.47034 | 30.2933 | 0       | 0       | 27.0321 | 14.4423 |
| 3  | ERS848f | M2-PK01f         | yu2015_16 CRC     | 0       | 0.12041 | 0.67977 | 0.24721 | 0       | 27.5634 | 9.57936 | 116.488 | 96.3634 | 0.05179 | 0       | 10.9021 | 0.23214 | 6.10606 | 0.24294 | 32.9307 | 0       | 0       | 7.81513 | 1.39471 |
| 4  | ERS848f | M2-PK01f         | yu2015_16 CRC     | 0       | 0.3876  | 0.56041 | 0       | 0       | 4.75376 | 1.2004  | 353.597 | 333.009 | 0       | 0       | 16.8485 | 0.34524 | 1.80808 | 0       | 109.603 | 0       | 0.10039 | 26.172  | 3.29418 |
| 5  | ERS848f | M2-PK00f         | yu2015_16 CRC     | 0       | 0.07494 | 0       | 0.21691 | 0.95556 | 5.51398 | 1.52976 | 2.58211 | 2.47917 | 0.14689 | 0       | 2.50117 | 1.97321 | 0.18855 | 0.5339  | 23.6867 | 0       | 0.42085 | 10.9793 | 1.05397 |
| 6  | ERS848f | M2-PK01f         | yu2015_16 CRC     | 0       | 2.16176 | 0.0917  | 0.91866 | 0       | 0.06559 | 1.7758  | 0.57598 | 0.71296 | 0.39548 | 0       | 1.72261 | 0       | 1.86532 | 0.07768 | 19.364  | 0       | 0.19949 | 4.49679 | 2.99577 |
| 7  | ERS848f | M2-PK01f         | yu2015_16 CRC     | 0       | 146.458 | 0       | 1.91866 | 0       | 0.05806 | 16.9405 | 6.02206 | 6.36574 | 0.11205 | 0       | 2.81701 | 1.82738 | 3.63131 | 0.41525 | 19.9347 | 0       | 0       | 1.15846 | 0.16296 |
| 8  | ERS848f | M123A            | yu2015_16 CRC     | 0       | 7.27338 | 0.33188 | 0       | 1.72184 | 3.43118 | 0.15278 | 53.8027 | 44.088  | 14.3183 | 0       | 0.61772 | 0       | 0.06902 | 0       | 11.72   | 0       | 0       | 0.36688 | 0       |
| 9  | ERS848f | A21A             | yu2015_16 control | 0.26701 | 0.03463 | 0.54003 | 0       | 0       | 0.2957  | 2.44048 | 0       | 0       | 25.3983 | 0       | 0.79138 | 1.50595 | 0.60269 | 2.11158 | 5.88134 | 0       | 0.34878 | 0.98858 | 0.24868 |
| 10 | ERS848f | M2-PK01f         | yu2015_16 CRC     | 0       | 0.2677  | 3.47453 | 0       | 0       | 1.76237 | 0.59723 | 0.4951  | 0.32407 | 0.22034 | 0       | 3.68182 | 0       | 0       | 1.08757 | 11.1973 | 0       | 0       | 8.63811 | 6.23598 |
| 11 | ERS848f | S06A             | yu2015_16 control | 0       | 0.08114 | 0.11499 | 0       | 0       | 0       | 0.30159 | 0       | 0       | 0       | 0       | 7.47435 | 2.67262 | 0.45455 | 6.30932 | 20.6333 | 0       | 0.27284 | 27.5782 | 20.2148 |
| 12 | ERS848f | M2-PK01f         | yu2015_16 CRC     | 0       | 0.0615  | 0       | 0       | 0       | 3.73441 | 4.03572 | 0.64093 | 1.07176 | 0.81639 | 0       | 8.72494 | 0       | 1.61448 | 0.49859 | 4.73067 | 0       | 0       | 16.06   | 2.51111 |
| 13 | ERS848f | M2-PK01f         | yu2015_16 CRC     | 0       | 0.88992 | 0       | 2.33812 | 0.11954 | 0.32366 | 1.43849 | 0.09314 | 0.18287 | 0.13465 | 0       | 8.46969 | 1.73214 | 9.05723 | 0.31921 | 24.2587 | 0       | 13.9305 | 29.7016 | 2.54497 |
| 14 | ERS848f | M116A            | yu2015_16 CRC     | 0       | 2.08062 | 2.88792 | 7.24721 | 1.45517 | 6.64301 | 13.994  | 1.81618 | 3.82176 | 0.83804 | 0       | 24.1585 | 4.02679 | 1.73064 | 0.63701 | 28.5453 | 0       | 0       | 29.7116 | 2.08783 |
| 15 | ERS848f | M115A            | yu2015_16 CRC     | 0       | 1.26253 | 0.77293 | 0.1244  | 0.28199 | 0.32258 | 3.83929 | 0.53186 | 0.49769 | 0       | 0       | 0.11655 | 0       | 0.06902 | 0       | 6.62667 | 0       | 0       | 0.44968 | 0       |
| 16 | ERS848f | M2-PK00f         | yu2015_16 CRC     | 0       | 6.84857 | 0       | 0.2488  | 2.0774  | 0.4043  | 19.4425 | 1.61397 | 1.02546 | 0       | 0       | 1.58042 | 0.12202 | 3.19697 | 3.7161  | 58.0827 | 0       | 0.19305 | 6.56959 | 6.52698 |
| 17 | ERS848f | M2-PK00f         | yu2015_16 CRC     | 0       | 4.63411 | 0       | 0.52632 | 0       | 0       | 2.51984 | 0       | 0       | 0.41337 | 0       | 3.66783 | 0       | 2.65489 | 0.08192 | 22.664  | 0       | 0.26512 | 16.1792 | 6.36402 |
| 18 | ERS848f | M2-PK00f         | yu2015_16 CRC     | 0       | 0       | 0.22125 | 0.1244  | 0       | 1.40753 | 1.04564 | 2.74265 | 2.35185 | 0.0339  | 0       | 1.98718 | 2.08036 | 1.50673 | 0.47175 | 15.912  | 0       | 0       | 5.31049 | 2.06349 |
| 19 | ERS848f | A60A             | yu2015_16 control | 0       | 3.6     | 6.28093 | 0.34928 | 0       | 0.87312 | 5.21032 | 0.37745 | 0.18287 | 2.77307 | 0       | 1.5     | 0.56845 | 0.28956 | 1.7613  | 16.4013 | 0       | 0       | 3.55888 | 0.63598 |
| 20 | ERS848f | M89A             | yu2015_16 CRC     | 0       | 0.02067 | 0.18632 | 0.48644 | 0       | 2.55269 | 63.877  | 0       | 0       | 0       | 0       | 0       | 2.36905 | 0.90741 | 0       | 2.75333 | 0       | 0       | 0.49893 | 0       |
| 21 | ERS848f | A51A             | yu2015_16 control | 0       | 0.077   | 0       | 0       | 0       | 1.75484 | 0.44643 | 0       | 0       | 0.21846 | 0       | 5.31119 | 1.86607 | 0.36027 | 14.9251 | 31.996  | 0       | 0       | 14.8515 | 3.55873 |
| 22 | ERS848f | M84A             | yu2015_16 CRC     | 0       | 0       | 0.55022 | 0       | 0.05977 | 0.07634 | 0.46032 | 1.42892 | 0.62037 | 0.03955 | 0       | 34.9417 | 1.58929 | 0.06734 | 0       | 42.2227 | 0       | 0       | 72.3291 | 5.32592 |
| 23 | ERS848f | M118A            | yu2015_16 CRC     | 0       | 0.15866 | 6.82678 | 0       | 0       | 2.32581 | 10.6468 | 6.02574 | 6.68055 | 4.74105 | 0       | 4.74009 | 0.46429 | 0.6936  | 0       | 11.0027 | 0       | 0       | 18.8258 | 10.2593 |
| 24 | ERS848f | M117A            | yu2015_16 CRC     | 0       | 0       | 0       | 0       | 0       | 0.23763 | 0.46429 | 0.17892 | 0       | 0.1177  | 0       | 5.90093 | 1.20833 | 0.66667 | 2.55226 | 10.3067 | 0       | 1.12741 | 5.33247 | 0.81587 |
| 25 | ERS848f | S09A             | yu2015_16 control | 0.19638 | 0.23256 | 0       | 0.47847 | 0.02912 | 0.0871  | 1.86905 | 0       | 0       | 0       | 0       | 12.0361 | 5.40178 | 1.61616 | 0       | 7.336   | 0       | 0       | 18.1392 | 4.56085 |
| 26 | ERS848f | M113A            | yu2015_16 CRC     | 0       | 1.56589 | 0.08588 | 1.84689 | 0.76092 | 0.61183 | 2.99206 | 0.3799  | 1.36806 | 0       | 0       | 0.61072 | 0.22917 | 1.09428 | 0       | 18.5627 | 0       | 0       | 0.27266 | 0       |
| 27 | ERS848f | M2-PK01f         | yu2015_16 CRC     | 0       | 0.30026 | 3.41921 | 0.23605 | 0       | 71.0871 | 2.36508 | 62.3713 | 44.2917 | 0.37006 | 0       | 8.03379 | 0.48214 | 4.52357 | 1.40396 | 25.0907 | 0       | 17.8919 | 12.242  | 1.35979 |
| 28 | ERS848f | M2-PK00f         | yu2015_16 CRC     | 0       | 3.48321 | 0       | 3.34769 | 0.23678 | 1.09893 | 12.5853 | 0.76471 | 0.73611 | 1.2307  | 0       | 10.3193 | 0.29762 | 0.86532 | 3.39407 | 13.8133 | 0       | 1.79794 | 6.32691 | 6.11323 |
| 29 | ERS848f | M2-PK00f         | yu2015_16 CRC     | 0       | 0.06202 | 0       | 0       | 0.34943 | 1.70538 | 7.7381  | 0.09559 | 0.85185 | 0       | 0       | 2.26084 | 31.3661 | 0.4798  | 0       | 94.696  | 0       | 0       | 7.57816 | 1.30688 |
| 30 | ERS848f | M2-PK01f         | yu2015_16 CRC     | 0       | 0.50543 | 0.32606 | 0.2488  | 0       | 2.05914 | 1.7381  | 0       | 0       | 0.13654 | 0       | 1.69487 | 0.23512 | 0.31482 | 0       | 6.18933 | 0       | 0.5444  | 4.16702 | 0.86571 |
| 31 | ERS848f | M2-PK03f         | yu2015_16 CRC     | 0       | 0.11835 | 0.22853 | 0.11962 | 0       | 0.1785  | 0       | 0.3848  | 0.18287 | 4.85593 | 0       | 9.14335 | 25.6696 | 23.6902 | 1.5678  | 177.455 | 0       | 0.1583  | 56.1163 | 5.18624 |
| 32 | ERS848f | M2-PK02f         | yu2015_16 CRC     | 0       | 0.58708 | 0       | 0.36204 | 0       | 0.74839 | 4.43452 | 4.63235 | 2.17593 | 1.32674 | 0       | 1.39977 | 1.09226 | 0       | 0       | 114.121 | 0       | 0       | 12.1256 | 0.97249 |
| 33 | ERS848f | M2-PK80f         | yu2015_16 control | 0       | 0.04134 | 0       | 0       | 0       | 2.20311 | 9.54564 | 0       | 0.12963 | 10.92   | 0       | 14.2412 | 18.5268 | 8.03704 | 1.25    | 106.432 | 20.3607 | 1.71943 | 86.8901 | 30.4402 |
| 34 | ERS848f | M2-PK03f         | yu2015_16 CRC     | 0       | 0       | 0.21106 | 0.24561 | 0.11954 | 0.15376 | 0.38492 | 0       | 0       | 0.56497 | 0       | 17.5058 | 1.98512 | 4.17677 | 0       | 33.82   | 0       | 0       | 58.4954 | 29.7957 |
| 35 | ERS848f | M2-PK04f         | yu2015_16 CRC     | 0       | 0.68889 | 7.87191 | 0.24721 | 1.10115 | 0.94301 | 2.25992 | 0.35784 | 0.47222 | 0.08098 | 0       | 1.12238 | 1.03572 | 0.98485 | 0.21186 | 11.5147 | 0       | 0       | 2.6167  | 0.34603 |
| 36 | ERS848f | M2-PK04f         | yu2015_16 CRC     | 0       | 0.37468 | 0       | 0.1244  | 0.05441 | 2.36882 | 4.53373 | 0.28799 | 0.36343 | 0.22034 | 0       | 13.993  | 0.9256  | 7.05387 | 9.61158 | 40.4507 | 0       | 3.50708 | 41.7145 | 12.5471 |
| 37 | ERS848f | M2-PK02f         | yu2015_16 CRC     | 0       | 0.97209 | 0       | 0.23126 | 0.47586 | 4.59893 | 5.35516 | 0.1875  | 0       | 0.03861 | 0       | 0.8683  | 1.92559 | 1.31987 | 0.43785 | 28.6973 | 0       | 0.08108 | 4.97074 | 0.39259 |
| 38 | ERS848f | M2-PK02f         | yu2015_16 CRC     | 0       | 0       | 3.39447 | 0.59968 | 0       | 12.1979 | 42.2976 | 30.049  | 24.7731 | 0.31356 | 0       | 6.35198 | 0.56845 | 10.1936 | 0.31356 | 20.5733 | 0       | 0.09395 | 23.0271 | 3.90688 |
| 39 | ERS848f | M2-PK03f         | yu2015_16 CRC     | 0       | 0       | 0.50769 | 0.49761 | 0       | 21.4269 | 0.86508 | 78.5184 | 51.338  | 0.17985 | 0       | 8.85547 | 1.61012 | 2.71381 | 1.30509 | 12.4053 | 0       | 8.574   | 21.9258 | 5.15979 |
| 40 | ERS848f | M2-PK00f         | yu2015_16 CRC     | 0       | 0.05736 | 0       | 0       | 0       | 2.90753 | 1.11706 | 2.05515 | 0.55093 | 0       | 0       | 6.14335 | 0       | 1.26263 | 0       | 60.5813 | 0       | 0.09781 | 62.3126 | 2.39577 |
| 41 | ERS848f | M2-PK01f         | yu2015_16 CRC     | 0       | 0       | 0       | 0       | 0       | 0.92796 | 0.92063 | 0.09436 | 0.71991 | 0.62618 | 0       | 6.25641 | 0.23512 | 0.1734  | 0       | 6.87467 | 0.19486 | 0.10039 | 31.5624 | 4.28254 |
| 42 | ERS848f | M2-PK02f         | yu2015_16 CRC     | 0       | 20.4393 | 0.49054 | 2.31419 | 9.73641 | 10.2882 | 10.8492 | 191.763 | 143.153 | 2.36818 | 0       | 15.345  | 8.97321 | 2.39731 | 41.5593 | 69.1907 | 0       | 1.41956 | 46.1078 | 8.10687 |
| 43 | ERS848f | M2-PK00f         | yu2015_16 CRC     | 0       | 1.96021 | 3.29985 | 0.61244 | 1.69425 | 8.13333 | 14.5754 | 8.78554 | 6.14352 | 5.5678  | 0       | 5.72611 | 4.39881 | 1.19697 | 0.55791 | 68.512  | 0       | 0       | 18.2106 | 1.54392 |
| 44 | ERS848f | M2-PK02f         | yu2015_16 CRC     | 0       | 0.35401 | 0.22999 | 0       | 0.11494 | 1.87634 | 10.2381 | 0.95221 | 0.36806 | 0.45104 | 0       | 38.127  | 1.64286 | 0.39562 | 5.49152 | 40.5013 | 0       | 0.09009 | 59.7709 | 11.0455 |
| 45 | ERS848f | M2-PK02f         | yu2015_16 CRC     | 0       | 0       | 0       | 0       | 0       | 2.9828  | 0       | 2.46937 | 1.21528 | 0.26648 | 0       | 60.4941 | 3.92559 | 3.41077 | 0.38842 | 72.424  | 0       | 0.09395 | 204.116 | 30.3365 |
| 46 | ERS848f | M2-PK03f         | yu2015_16 CRC     | 0       | 1.32352 | 0.11208 | 0.86603 | 0       | 0.93441 | 0.45635 | 0.19363 | 1.8056  | 1.21563 | 0       | 8.84265 | 0.59524 | 5.25926 | 0.09887 | 12.5773 | 0.12852 | 0.80566 | 50.4689 | 8.97883 |
| 47 | ERS848f | M2-PK02f         | yu2015_16 CRC     | 0       | 1.2093  | 5.52401 | 1.37799 | 0.23831 | 3.13118 | 1.39087 | 3.7549  | 2.47917 | 0       | 0       | 7.6282  | 2.12203 | 1.98148 | 2.4209  | 6.16133 | 0.5796  | 0       | 27.7216 | 6.72064 |
| 48 | ERS848f | S36A             | yu2015_16 control | 0.2696  | 0.03411 | 0       | 0.1244  | 0       | 4.0871  | 2.45833 | 0.06985 | 0.18519 | 2.70527 | 0       | 43.8205 | 1.50595 | 24.5286 | 8.16102 | 33.3427 | 0.48839 | 8.53024 | 97.828  | 15.1206 |
| 49 | ERS848f | S34A             | yu2015_16 control | 0       | 0.0594  |         |         |         |         |         |         |         |         |         |         |         |         |         |         |         |         |         |         |

| #   | sequer  | sample_nstudy_id | group             | 370640  | 482585  | 1704941 | 2736705 | 3246804 | 1696299 | 2040133 | 2361423 | 3173495 | 181682  | 3531210 | 3976414 | 2211919 | 1804565 | 2206475 | 1559769 | 4256106 | 3611706 | 3319526 | 4171064 |
|-----|---------|------------------|-------------------|---------|---------|---------|---------|---------|---------|---------|---------|---------|---------|---------|---------|---------|---------|---------|---------|---------|---------|---------|---------|
| 58  | ERS848f | M2-PK50f         | yu2015_16 control | 0       | 0       | 0       | 0       | 0       | 0       | 0.25123 | 0.36806 | 0.18456 | 0       | 15.2762 | 1.58929 | 1.52862 | 5.74011 | 51.7707 | 0       | 0       | 54.414  | 7.4455  |         |
| 59  | ERS848f | M2-PK51f         | yu2015_16 control | 3.03187 | 0       | 0       | 0       | 0       | 0       | 0.60119 | 0       | 0       | 0       | 0       | 5.99404 | 0.5     | 0       | 66.128  | 0       | 0       | 0.50036 | 0.16191 |         |
| 60  | ERS848f | 522A             | yu2015_16 control | 0       | 0.34367 | 0.11499 | 0       | 0       | 0.4914  | 0.9127  | 0.18995 | 0.39583 | 1.65066 | 10.0584 | 23.2482 | 0       | 0.32155 | 14.5565 | 32.2653 | 0       | 0       | 44.1727 | 5.87725 |
| 61  | ERS848f | M2-PK52f         | yu2015_16 control | 5.32386 | 0.49819 | 0       | 0       | 0       | 3.69032 | 5.39286 | 0.0625  | 0.18287 | 10.0706 | 0       | 14.9056 | 4.6994  | 5.44445 | 5.46045 | 53.1827 | 0       | 76.8391 | 34.0378 | 11.6667 |
| 62  | ERS848f | M2-PK52f         | yu2015_16 control | 0       | 0       | 0       | 0       | 0       | 0.64516 | 0.15476 | 0       | 0       | 4.15348 | 0       | 53.3543 | 2.83334 | 5.70707 | 5.06921 | 36.8453 | 0       | 27.547  | 109.175 | 16.472  |
| 63  | ERS848f | M2-PK53f         | yu2015_16 control | 0       | 0.11886 | 0       | 0       | 0       | 0.98602 | 0.60913 | 0       | 0       | 1.87288 | 0       | 10.6224 | 2.97619 | 2.17509 | 0.78814 | 22.8333 | 0       | 0       | 18.7216 | 7.5217  |
| 64  | ERS848f | M2-PK53f         | yu2015_16 control | 0       | 0       | 0       | 0       | 0       | 12.9527 | 1.63889 | 0       | 0       | 0.64219 | 0.26461 | 13.2657 | 0.65774 | 1.1128  | 6.88136 | 9.23466 | 0.06302 | 7.1583  | 22.2669 | 3.70582 |
| 65  | ERS848f | M2-PK54f         | yu2015_16 control | 0       | 0       | 0       | 0       | 0       | 1.13226 | 0.60516 | 0       | 0       | 2.26836 | 0       | 5.62004 | 1.65476 | 2.05387 | 6.67231 | 11.4613 | 0.13018 | 0       | 34.7445 | 6.48148 |
| 66  | ERS848f | M2-PK54f         | yu2015_16 control | 0       | 0.0801  | 0       | 0.11324 | 0       | 0.4828  | 2.02778 | 0.1924  | 0       | 21.9124 | 0       | 136.657 | 1.97619 | 0.61448 | 3.5339  | 28.6467 | 0       | 0       | 278.615 | 82.5312 |
| 67  | ERS848f | M2-PK55f         | yu2015_16 control | 0       | 0.02067 | 0       | 0.36842 | 0       | 0.77097 | 5.56151 | 0       | 0       | 2.56121 | 0       | 5.04895 | 3.52083 | 3.59427 | 3.57627 | 19.856  | 2.34577 | 257.322 | 23.1977 | 8.24126 |
| 68  | ERS848f | M2-PK55f         | yu2015_16 control | 0       | 0       | 0       | 0       | 0       | 1.21075 | 1.25198 | 0       | 0       | 0.09605 | 0       | 35.4475 | 2.10417 | 36.3182 | 4.05226 | 44.4827 | 1.32172 | 1.86615 | 118.829 | 23.3323 |
| 69  | ERS848f | M2-PK60f         | yu2015_16 control | 0       | 0.30336 | 0       | 0       | 0       | 0.54624 | 2.21032 | 0       | 0       | 0.10923 | 0       | 7.57459 | 2.14583 | 1.08586 | 0.48729 | 27.384  | 0       | 1.28314 | 17.2248 | 3.21587 |
| 70  | ERS848f | M2-PK61f         | yu2015_16 control | 0       | 0.09974 | 1.67977 | 0.1244  | 0       | 28.428  | 1.36508 | 159.824 | 163.19  | 0.03861 | 0.0882  | 15.2284 | 2.22917 | 1.96465 | 1.46469 | 46.9107 | 0       | 39.0836 | 32.2905 | 3.86561 |
| 71  | ERS848f | M2-PK61f         | yu2015_16 control | 2.24203 | 0       | 0       | 0       | 0       | 0.36452 | 0.43651 | 0       | 0       | 0.04708 | 0       | 9.57575 | 3.125   | 1.92593 | 0.48164 | 24.2027 | 1.1874  | 15.408  | 26.7124 | 5.73016 |
| 72  | ERS848f | M2-PK61f         | yu2015_16 control | 0.06546 | 0.01602 | 0       | 0       | 0       | 0.12473 | 2.13293 | 0       | 0       | 6.65819 | 0       | 61.5384 | 4.10715 | 5.00674 | 10.5508 | 43.168  | 0       | 0       | 96.3176 | 16.0688 |
| 73  | ERS848f | M2-PK63f         | yu2015_16 control | 1.76141 | 0.20207 | 0       | 0       | 0       | 0.77849 | 4.23412 | 0.0723  | 0       | 14.5603 | 0       | 20.7681 | 3.08929 | 10.6835 | 5.64972 | 54.3347 | 0       | 0.73616 | 48.1313 | 12.4952 |
| 74  | ERS848f | M2-PK64f         | yu2015_16 control | 0       | 1.5168  | 0.18341 | 0.12121 | 0       | 0.17312 | 4.13691 | 0.09681 | 0.18519 | 0.05367 | 0       | 0.51399 | 0       | 20.1094 | 2.27119 | 25.02   | 0       | 2.27542 | 0.0464  | 0       |
| 75  | ERS848f | M2-PK64f         | yu2015_16 control | 1.05082 | 0.01602 | 0       | 0.12121 | 0       | 0.43979 | 0.2996  | 0.15441 | 0       | 3.66667 | 0       | 19.6352 | 1.38691 | 4.04209 | 1.05791 | 29.9053 | 0.32421 | 0.1583  | 54.7145 | 13.7429 |
| 76  | ERS848f | M2-PK64f         | yu2015_16 control | 0       | 0.40207 | 1.88646 | 0.24721 | 0       | 2.58494 | 2.44841 | 0       | 0       | 0.62147 | 0       | 0.6352  | 2.20238 | 0.26431 | 0.17373 | 18.3493 | 0       | 0       | 1.43754 | 0.15979 |
| 77  | ERS848f | M2-PK65f         | yu2015_16 control | 0       | 0.22481 | 0       | 0       | 1.03755 | 0.03333 | 38.8135 | 0       | 0       | 0.71563 | 0.6575  | 21.7517 | 17.2262 | 0.65488 | 0.28107 | 143.609 | 0       | 0       | 60.758  | 14.6222 |
| 78  | ERS848f | M2-PK65f         | yu2015_16 control | 0       | 0.29044 | 0       | 0       | 0       | 1.13118 | 7.25595 | 0       | 0       | 5.04426 | 0       | 33.5408 | 4.05655 | 7.12795 | 0.86441 | 36.556  | 0       | 0.6139  | 76.0864 | 16.1704 |
| 79  | ERS848f | M2-PK65f         | yu2015_16 control | 0       | 0       | 0       | 0       | 0.05977 | 2.27419 | 2.24206 | 0       | 0       | 6.42185 | 0       | 68.3403 | 17.2411 | 8.00841 | 22.0607 | 79.244  | 9.65009 | 3.76834 | 141.528 | 69.6465 |
| 80  | ERS848f | M2-PK66f         | yu2015_16 control | 1.51077 | 0.03463 | 0       | 0.24402 | 0       | 0.85699 | 0       | 0.62745 | 0       | 0.42185 | 0       | 19.31   | 2.82441 | 4.38552 | 0       | 22.2293 | 0       | 5.39897 | 48.4333 | 4.6127  |
| 81  | ERS848f | M2-PK69f         | yu2015_16 control | 0       | 0       | 0       | 0       | 0       | 1.69462 | 1.79563 | 0       | 0       | 3.7307  | 0       | 10.3054 | 5.1519  | 2.29461 | 1.5452  | 15.7653 | 0.18906 | 43.3552 | 29.4133 | 9.81375 |
| 82  | ERS848f | M2-PK70f         | yu2015_16 control | 0       | 0.17313 | 0       | 0       | 0       | 7.31936 | 3.59326 | 0       | 0       | 0.0904  | 0       | 11.1643 | 5.99702 | 2.58586 | 0.44774 | 44.8173 | 0       | 2.42214 | 24.06   | 11.4413 |
| 83  | ERS848f | M2-PK70f         | yu2015_16 control | 0.50991 | 0       | 0       | 0       | 0       | 1.3     | 0.72818 | 0       | 0       | 1.21092 | 0       | 3.98252 | 2.73512 | 0.41077 | 5.83051 | 6.93334 | 0.06551 | 0.37194 | 8.36188 | 1.43175 |
| 84  | ERS848f | M2-PK70f         | yu2015_16 control | 0       | 0.09406 | 0       | 0       | 0       | 0.49677 | 1.72222 | 0       | 0       | 0.95386 | 0       | 15.0524 | 0.42262 | 3.90909 | 23.9195 | 18.16   | 0.96103 | 2.54183 | 31.6845 | 5.59788 |
| 85  | ERS848f | M2-PK71f         | yu2015_16 control | 0       | 0.02067 | 0       | 0       | 0       | 0       | 0.77579 | 0       | 0       | 0.34463 | 0       | 20.7611 | 14.0804 | 4.22896 | 0       | 47.404  | 24.558  | 0       | 41.4875 | 3.90159 |
| 86  | ERS848f | M2-PK71f         | yu2015_16 control | 0       | 0       | 0       | 0       | 0       | 0.26667 | 1.42262 | 0       | 0       | 17.0028 | 0       | 30.4137 | 0.1875  | 1.83165 | 48.1229 | 62.3693 | 0       | 24.2612 | 65.4011 | 26.8614 |
| 87  | ERS848f | M2-PK72f         | yu2015_16 control | 0       | 0.02067 | 0       | 0       | 0       | 0.79462 | 1.6369  | 0       | 0       | 0.2194  | 0       | 3.70513 | 1.13095 | 1.30303 | 0.31921 | 8.536   | 8.91708 | 0.82111 | 14.1492 | 1.65503 |
| 88  | ERS848f | M2-PK72f         | yu2015_16 control | 0       | 0.6646  | 0.09898 | 0       | 0       | 1.54086 | 1.19643 | 0       | 0.17824 | 0.3484  | 0       | 15.2599 | 2.74405 | 7.6734  | 1.6822  | 12.952  | 0       | 1.12613 | 21.1085 | 7.63809 |
| 89  | ERS848f | M2-PK72f         | yu2015_16 control | 0       | 0.03721 | 0       | 0       | 0       | 0.31505 | 8.7262  | 0       | 0       | 1.04332 | 0       | 10.8019 | 0       | 5.20034 | 0.13701 | 29.244  | 0.44942 | 12.906  | 30.9079 | 6.70793 |
| 90  | ERS848f | M2-PK73f         | yu2015_16 control | 9.51076 | 0.29767 | 0       | 0       | 0.05977 | 0.06452 | 0.74405 | 0       | 0       | 0.48588 | 0       | 5.5338  | 4.22619 | 5.64983 | 0.21751 | 29.996  | 0       | 2.07078 | 17.1627 | 8.27725 |
| 91  | ERS848f | M2-PK73f         | yu2015_16 control | 0       | 0       | 0       | 0       | 0       | 0.34731 | 0.85913 | 0       | 0       | 1.73164 | 0       | 12.5618 | 0.9256  | 3.03199 | 0.29944 | 11.58   | 0.2927  | 18.1737 | 20.4561 | 3.21375 |
| 92  | ERS848f | M2-PK75f         | yu2015_16 control | 1.55039 | 0.06305 | 0       | 0       | 0       | 0.13656 | 2.61111 | 0       | 0       | 3.03484 | 0       | 10.6107 | 1.0506  | 2.98653 | 3.70904 | 24.588  | 0.61028 | 0.44402 | 29.8751 | 5.27407 |
| 93  | ERS848f | M2-PK75f         | yu2015_16 control | 0       | 0.11628 | 0.3639  | 0       | 0       | 1.6914  | 3.375   | 0.91544 | 1.08565 | 1.49435 | 0       | 42.6457 | 8.54761 | 12.7997 | 3.10593 | 91.1347 | 11.476  | 0       | 119.712 | 39.8508 |
| 94  | ERS848f | M2-PK79f         | yu2015_16 control | 0       | 2.44238 | 0       | 0       | 0       | 0.41505 | 1.12302 | 0.57843 | 0.50463 | 23.8428 | 0       | 19.7669 | 11.1577 | 12.4108 | 0       | 53.4534 | 0       | 0.1583  | 49.424  | 21.0286 |
| 95  | ERS848f | M2-PK04f         | yu2015_16 CRC     | 0       | 2.41602 | 0.09461 | 0       | 0       | 1.54731 | 34.5833 | 0.43873 | 1.0463  | 0       | 0       | 0.72611 | 0       | 0       | 0       | 16.3627 | 0       | 0.14929 | 0.9222  | 0.07937 |
| 96  | ERS848f | M2-PK04f         | yu2015_16 CRC     | 0       | 2.26822 | 0.22853 | 1.10367 | 0.17625 | 0.37097 | 32.9167 | 9.14462 | 11.2824 | 10.4623 | 0       | 95.0955 | 5.97024 | 0.19529 | 0       | 47.8413 | 0       | 22.6178 | 204.116 | 51.0529 |
| 97  | ERS848f | M2-PK04f         | yu2015_16 CRC     | 0       | 5.31731 | 0.29258 | 4.66507 | 0       | 1.77097 | 18.1369 | 3.36274 | 4.29629 | 0       | 0       | 2.17016 | 0.79464 | 0.9495  | 0       | 8.16534 | 0.06302 | 0       | 3.65382 | 0.34392 |
| 98  | ERS848f | M2-PK04f         | yu2015_16 CRC     | 0       | 0.27804 | 0.53712 | 0.24083 | 5.36552 | 1.40645 | 14.4524 | 2.83946 | 2.48611 | 0       | 0       | 8.79021 | 0       | 9.87205 | 0.68927 | 18.904  | 0       | 0.1879  | 15.7723 | 2.34074 |
| 99  | ERS848f | M2-PK05f         | yu2015_16 CRC     | 0       | 0.52506 | 0.11499 | 0       | 6.00154 | 1.32688 | 10.9464 | 0       | 0       | 0       | 0       | 8.38927 | 0       | 0.05051 | 0       | 30.8773 | 0       | 0       | 19.5375 | 19.6042 |
| 100 | ERS848f | M2-PK05f         | yu2015_16 CRC     | 0       | 1.41706 | 0       | 0.1244  | 0       | 0.29247 | 4.89683 | 0.28431 | 0.53472 | 8.33804 | 0       | 11.2564 | 0       | 0.12458 | 17.6723 | 6.95067 | 0       | 0       | 14.6924 | 5.40106 |
| 101 | ERS848f | M2-PK05f         | yu2015_16 CRC     | 0       | 0.18088 | 0.32314 | 0.2488  | 0       | 0.7914  | 4.30357 | 1.31005 | 0.35648 | 0.1403  | 0       | 16.979  | 1.3125  | 3.05387 | 0.74294 | 55.7547 | 0       | 0       | 53.8779 | 15.7344 |
| 102 | ERS848f | M2-PK05f         | yu2015_16 CRC     | 0       | 0.39225 | 0.22271 | 0       | 0       | 0.17742 | 0.91667 | 0.09191 | 0.16667 | 20.0169 | 0       | 46.8613 | 3.26786 | 2.1532  | 5.45763 | 28.3107 | 0       | 0       | 106.669 | 18.2275 |
| 103 | ERS848f | M2-PK06f         | yu2015_16 CRC     | 0       | 0.27959 | 0.22416 | 0.1244  | 0       | 0.32151 | 0.44048 | 0.6152  | 0       | 0.73729 | 0       | 14.2366 | 5.44941 | 0       | 0       | 104.167 | 0       | 0       | 68.0149 | 87.5608 |
| 104 | ERS848f | M2-PK06f         | yu2015_16 CRC     | 0       | 0       | 0       | 0.35407 | 1.15709 | 0.04946 | 13.006  | 0.09804 | 0       | 0       | 0       | 3.48135 | 0.17857 | 4.05724 | 0       | 5.99467 | 0.29353 | 0.77992 | 4.7723  | 3.32487 |
| 105 | ERS848f | M2-PK06f         | yu2015_16 CRC     | 0       | 0.07649 | 1.15429 | 0       | 0       | 0.64624 | 0.15079 | 0.50735 | 0.53241 | 0.11299 | 0       | 2.85664 | 0       | 0.95118 | 0.14972 | 6.77334 | 0       | 0       | 6.38687 | 1.17143 |
| 106 | ERS848f | M2-PK06f         | yu2015_16 CRC     | 0       | 0.10129 | 0       | 0       | 0       | 0.33871 | 0.30159 | 0.09681 | 0.18287 | 1.87194 | 0       | 9.38578 | 0.23512 | 6.6128  | 0       | 40.0347 | 5.82173 | 4.10811 | 26.576  | 4.43915 |
| 107 | ERS848f | M2-PK06f         | yu2015_16 CRC     | 0       | 0.446   | 0.2198  | 0.2504  | 0.35632 | 3.89247 | 5.70833 | 14.8    |         |         |         |         |         |         |         |         |         |         |         |         |

| #   | sequer  | sample_nstudy_id | group      | 370640  | 482585  | 1704941 | 2736705 | 3246804 | 1696299 | 2040133 | 2361423 | 3173495 | 181682  | 3531210 | 3976414 | 2211919 | 1804565 | 2206475 | 1559769 | 4256106 | 3611706 | 3319526 | 4171064 |         |
|-----|---------|------------------|------------|---------|---------|---------|---------|---------|---------|---------|---------|---------|---------|---------|---------|---------|---------|---------|---------|---------|---------|---------|---------|---------|
| 115 | ERS8487 | MSC54A           | yu2015_16  | CRC     | 0       | 2.5354  | 1.0524  | 1.77831 | 5.44981 | 1.50108 | 1.73413 | 9.0429  | 9.61574 | 0       | 0       | 0       | 0.76599 | 0       | 25.3587 | 0       | 0       | 0       | 0       |         |
| 116 | ERS8487 | MSC63A           | yu2015_16  | CRC     | 0       | 0.4186  | 3.38282 | 0.24402 | 0       | 0.93979 | 1.6508  | 1.81495 | 1.76158 | 0       | 0       | 5.65501 | 0       | 1.36532 | 0       | 11.4027 | 0       | 0       | 27.212  | 17.1788 |
| 117 | ERS8487 | MSC76A           | yu2015_16  | CRC     | 0.0646  | 0.59845 | 2.43086 | 0.70814 | 0.03831 | 5.83978 | 0.4623  | 12.9963 | 6.48841 | 0       | 0       | 3.46736 | 0       | 0.05892 | 0       | 2.71333 | 0       | 0.19434 | 10.8294 | 2.66138 |
| 118 | ERS8487 | MSC78A           | yu2015_16  | CRC     | 0       | 0.02067 | 0.21397 | 0.48804 | 3.1885  | 0.65591 | 2.94643 | 2.6875  | 1.09491 | 1.88512 | 0       | 0.65268 | 1.5     | 0.07744 | 10.2302 | 27.1853 | 0       | 0.10039 | 5.32191 | 8.86349 |
| 119 | ERS8487 | MSC79A           | yu2015_16  | CRC     | 0       | 5.20724 | 8.25765 | 0       | 1.0023  | 12.1505 | 3.97619 | 47.4804 | 43.4236 | 0.24106 | 0       | 10.5396 | 0.47024 | 2.00674 | 0       | 16.9053 | 0       | 0       | 65.7309 | 18.9905 |
| 120 | ERS8487 | MSC81A           | yu2015_16  | CRC     | 0       | 1.10749 | 0.11499 | 0.1244  | 0.20077 | 4.26989 | 8.37302 | 0.57966 | 0.97917 | 69.0838 | 0       | 0       | 0       | 0.16667 | 0       | 37.7693 | 0       | 0       | 0.40614 | 0.06455 |
| 121 | ERS8487 | MSC103A          | yu2015_16  | CRC     | 0.24892 | 0.25581 | 1.0393  | 0.24721 | 0       | 3.34409 | 18.881  | 0.82843 | 0.36574 | 0.03861 | 0       | 38.6841 | 0.97619 | 12.3165 | 3.48728 | 40.948  | 0       | 0.08494 | 84.6923 | 13.5249 |
| 122 | ERS8487 | MSC119A          | yu2015_16  | CRC     | 0       | 1.72765 | 0.34789 | 0       | 0       | 0.13656 | 0.74206 | 0.56863 | 0       | 0.15066 | 0       | 5.93823 | 0.99702 | 0.53367 | 0.31356 | 16.4373 | 0       | 0.21364 | 19.7873 | 4.86879 |
| 123 | ERS8487 | MSC120A          | yu2015_16  | CRC     | 0       | 0       | 0       | 0       | 0.11724 | 1.76989 | 7.4623  | 6.2451  | 3.35648 | 0.45386 | 0       | 12.4417 | 0.47321 | 4.54882 | 1.13277 | 64.456  | 0       | 0       | 18.5696 | 2.55238 |
| 124 | ERS8487 | M2-PK52          | (yu2015_16 | control | 0.20241 | 0.01602 | 0       | 0       | 0       | 1.24839 | 1.58929 | 0       | 0       | 4.03013 | 0       | 14.2506 | 14.5208 | 13.9697 | 5.80933 | 103.845 | 0.72803 | 3.79279 | 66.1841 | 13.3799 |
| 125 | ERS8487 | M2-PK53          | yu2015_16  | control | 0       | 0.28217 | 0       | 0       | 0       | 0.22043 | 3.0377  | 0.36152 | 0.36343 | 1.49906 | 0       | 17.1002 | 4.91964 | 3.26768 | 6.27119 | 109.372 | 0       | 13.2715 | 51.3283 | 7.18306 |
| 126 | ERS8487 | M2-PK05          | yu2015_16  | CRC     | 0       | 0.50026 | 0       | 2.14354 | 0       | 0.29032 | 6.15873 | 0.2451  | 0.17824 | 0.09981 | 0       | 14.3939 | 0.09226 | 1.70875 | 1.06215 | 12.536  | 0       | 1.75804 | 48.8215 | 3.83915 |
| 127 | ERS8487 | M2-PK06          | yu2015_16  | CRC     | 0       | 0.09561 | 0.11499 | 0.34609 | 0       | 0.97312 | 1.56349 | 0.3848  | 0.5162  | 0.8032  | 0       | 22.1142 | 1.80655 | 14.4007 | 3.39689 | 91.0827 | 0       | 1.02059 | 95.1913 | 16.7704 |
| 128 | ERS8487 | M2-PK08          | yu2015_16  | CRC     | 0       | 0       | 3.3115  | 2.11962 | 0       | 1.84301 | 98.9743 | 76.435  | 58.6713 | 1.06309 | 0       | 0.6352  | 0       | 7.33502 | 0       | 50.288  | 0       | 0       | 2.11278 | 1.06243 |
| 129 | S1_001  | ANS1033          | yu2017     | control | 0       | 0       | 0       | 0       | 0       | 3.3828  | 6.96429 | 0       | 0       | 26.1205 | 0       | 58.9207 | 2.83333 | 1.71044 | 0.90113 | 50.2787 | 0       | 10.1982 | 88.9871 | 28.6656 |
| 130 | S1_002  | ANS1103          | yu2017     | control | 0       | 0.02067 | 0       | 0       | 0       | 0.82258 | 0       | 0       | 0       | 0.03861 | 0       | 31.345  | 2.9375  | 1.36532 | 16.2698 | 42.1973 | 0       | 0       | 59.7823 | 17.5333 |
| 131 | S1_003  | ANS1120          | yu2017     | control | 0       | 0       | 0       | 0       | 0       | 0.43333 | 0       | 0       | 0       | 0.14689 | 0       | 43.4638 | 5.17261 | 2.31481 | 0.96751 | 42.7547 | 0       | 0.53925 | 67.586  | 14.7217 |
| 132 | S1_004  | ANS1137          | yu2017     | control | 0.03531 | 0.72403 | 1.39301 | 0       | 0.36858 | 2.83656 | 31.9306 | 0       | 1.53704 | 21.0217 | 0       | 76.5221 | 5.51786 | 2.61111 | 12.5791 | 75.9947 | 0       | 64.6306 | 102.641 | 18.0624 |
| 133 | S1_005  | ANS1146          | yu2017     | control | 0       | 1.8186  | 0       | 0.53429 | 2.93333 | 0       | 13.2242 | 0.27451 | 0       | 0.21469 | 0       | 8.05245 | 1.11012 | 1.93266 | 0       | 15.18   | 0       | 2.79022 | 4.19629 | 3.00529 |
| 134 | S1_006  | ANS1155          | yu2017     | control | 0       | 0.58811 | 0       | 0       | 0       | 1.49463 | 1.31349 | 0       | 0       | 1.74953 | 0       | 29.2645 | 3.16071 | 0.82492 | 0.16102 | 45.6307 | 0       | 2.48391 | 49.9807 | 6.21375 |
| 135 | S1_007  | ANS1192          | yu2017     | control | 0       | 1.23411 | 4.18632 | 0       | 0       | 0.93333 | 0       | 0       | 0       | 0       | 0       | 2.65035 | 0       | 0.52694 | 0.05791 | 22.68   | 0       | 0       | 0.68594 | 0.37037 |
| 136 | S1_008  | ANS1203          | yu2017     | control | 0       | 0       | 0       | 0       | 0       | 1.32151 | 1.53968 | 0.13603 | 0.78472 | 0.67514 | 0.66323 | 22.7844 | 0.6131  | 2.77946 | 0.80085 | 15.536  | 1.86484 | 0       | 22.2555 | 5.47831 |
| 137 | S1_009  | ANS1211          | yu2017     | control | 0       | 1.02015 | 4.64483 | 0       | 0       | 0.26667 | 52.0476 | 0       | 5.43503 | 0       | 0       | 74.8613 | 0       | 1.16498 | 0.69915 | 83.952  | 0       | 144.54  | 163.78  |         |
| 138 | S1_010  | ANS1214          | yu2017     | control | 0       | 1.11731 | 0       | 0.17544 | 0.03985 | 1.58817 | 6.64286 | 0       | 0       | 0       | 0       | 13.5909 | 5.49405 | 0.24579 | 0       | 33.9827 | 0       | 0       | 18.2691 | 4.50688 |
| 139 | S1_011  | ANS1216          | yu2017     | control | 0       | 0.57571 | 0.0524  | 0.18182 | 0       | 0.06129 | 13.0278 | 0.09191 | 0       | 0       | 0       | 26.0245 | 8.81248 | 1.8165  | 3.49435 | 44.1907 | 0       | 31.5225 | 51.5824 | 17.5587 |
| 140 | S1_012  | ANS1227          | yu2017     | control | 0       | 0.36434 | 0.34352 | 0.36364 | 0       | 0       | 8.09524 | 0       | 0.94445 | 0       | 0       | 18.6573 | 0       | 0       | 4.65396 | 11.764  | 0       | 0       | 25.4989 | 13.0889 |
| 141 | S1_013  | ANS1232          | yu2017     | control | 0       | 0.11731 | 3.45852 | 0       | 0       | 1.93763 | 2.13095 | 0       | 0.45602 | 0.37006 | 0       | 7.49067 | 2.08036 | 14.6818 | 18.7924 | 39.9613 | 0       | 0       | 15.7159 | 5.41799 |
| 142 | S1_014  | ANS1234          | yu2017     | control | 0       | 4.7199  | 0       | 1.39873 | 0       | 0.24194 | 24.4147 | 0       | 0.26389 | 0       | 0       | 0.48485 | 0       | 0.08418 | 0       | 47.7627 | 0       | 0       | 0.08137 | 0       |
| 143 | S1_015  | ANS1237          | yu2017     | control | 0       | 0       | 0       | 0       | 0       | 0.73548 | 1.18453 | 0       | 0       | 0.25235 | 0       | 7.74942 | 0.26191 | 0.46296 | 2.38277 | 26.9573 | 0       | 0       | 14.7095 | 1.48254 |
| 144 | S1_016  | ANS1238          | yu2017     | control | 0       | 0.06202 | 0       | 0       | 0       | 5.31291 | 2.23611 | 0       | 0       | 1.28908 | 0.94387 | 29.9988 | 5.24703 | 5.95118 | 15.9703 | 51.204  | 0       | 1.52381 | 50.6067 | 11.4593 |
| 145 | S1_017  | ANS1240          | yu2017     | control | 16.435  | 0.20672 | 0       | 0.17863 | 0       | 0.33763 | 2.52381 | 0.03922 | 0       | 0       | 1.32073 | 21.3764 | 0       | 0.72222 | 0       | 42.168  | 0.6136  | 1.71429 | 49.1763 | 24.2508 |
| 146 | S1_018  | ANS1444          | yu2017     | control | 0       | 0.11783 | 0       | 0       | 0       | 0.03441 | 0       | 0       | 0       | 33.6591 | 0       | 1.99767 | 0       | 0.4798  | 0       | 7.45467 | 0       | 0       | 0.1449  | 0.10688 |
| 147 | S1_019  | ANS1452          | yu2017     | control | 35.7631 | 0.11215 | 0       | 0       | 0       | 0.07097 | 2.77183 | 0.1348  | 0.5162  | 0.70151 | 0       | 77.4102 | 2.08036 | 12.2222 | 2.50282 | 113.111 | 0       | 0.21364 | 103.905 | 25.1725 |
| 148 | S1_020  | ANS1462          | yu2017     | control | 10.0939 | 1.52662 | 1.04076 | 0.54386 | 0       | 0.62688 | 17.4921 | 0       | 0       | 29.0085 | 0       | 23.4755 | 4.66964 | 1.6835  | 10.1568 | 48.9053 | 0       | 3.60618 | 35.1392 | 6.24338 |
| 149 | S1_021  | ANS1466          | yu2017     | control | 0       | 1.78812 | 74.639  | 0       | 0       | 12.5333 | 7.85119 | 0.72549 | 1.46759 | 0.05744 | 0       | 2.43007 | 2.05655 | 6.32491 | 0       | 9.41067 | 0       | 0       | 5.93434 | 1.05926 |
| 150 | S1_022  | ANS1470          | yu2017     | control | 0.28941 | 0.09819 | 0       | 0       | 0       | 3.54086 | 2.26587 | 0       | 0       | 1.31733 | 0       | 22.5956 | 0.3125  | 4.22559 | 1.36441 | 19.5893 | 0       | 0.14286 | 43.8401 | 7.71111 |
| 151 | S1_023  | ANS1472          | yu2017     | control | 0       | 0.38811 | 0.13246 | 0       | 0       | 0.3914  | 2.75992 | 0       | 0       | 1.5452  | 0       | 93.4487 | 5.36906 | 0.55892 | 16.1737 | 108.984 | 0       | 0       | 167.712 | 88.3714 |
| 152 | S1_024  | ANS1480          | yu2017     | control | 0       | 0.35349 | 0       | 0       | 0       | 1.11075 | 13.6687 | 0.0674  | 0.24074 | 0.26177 | 0       | 159.035 | 15.4226 | 4.21212 | 0.49435 | 173.772 | 0       | 0       | 237.713 | 58.0952 |
| 153 | S1_025  | ANS1483          | yu2017     | control | 17.093  | 0.74884 | 0       | 0       | 0.86896 | 0.3785  | 2.72023 | 0.13971 | 0       | 1.01036 | 0       | 52.451  | 1.55952 | 9.7761  | 1.10734 | 59.7453 | 0.77695 | 3.47361 | 96.3105 | 48.7587 |
| 154 | S1_026  | ANS1484          | yu2017     | control | 0       | 0       | 0       | 0       | 0       | 1.48172 | 0       | 0.32966 | 0       | 55.9313 | 0       | 21.465  | 3.30357 | 1.5202  | 0       | 29.8987 | 0       | 0       | 47.0764 | 20.9079 |
| 155 | S1_027  | ANS1486          | yu2017     | control | 24.2575 | 0.04134 | 0.29403 | 0       | 0       | 1.35591 | 6.69445 | 0.60172 | 0       | 5.54708 | 0       | 40.4871 | 17.5923 | 3.9596  | 21.6158 | 72.408  | 2.41211 | 1.60489 | 69.4625 | 18.9683 |
| 156 | S1_028  | ANS1493          | yu2017     | control | 0       | 0.03204 | 0       | 0       | 0       | 0.96882 | 0.80159 | 0       | 0.15972 | 0.1742  | 0       | 27.3042 | 0       | 1.13973 | 0       | 18.2213 | 0       | 0.0991  | 45.0557 | 16.9111 |
| 157 | S1_029  | ANS1495          | yu2017     | control | 27.7476 | 1.0863  | 5.00436 | 1.1244  | 0       | 0       | 12.0575 | 0       | 0       | 0.48682 | 0       | 3.25874 | 0.66667 | 0.37542 | 5.43503 | 13.256  | 0       | 0       | 4.7459  | 4.0127  |
| 158 | S1_030  | ANS1496          | yu2017     | control | 3.11542 | 0.01809 | 0       | 0       | 0       | 0.12258 | 6.63095 | 0.27696 | 0.48611 | 0.76083 | 2.49485 | 22.9312 | 2.71131 | 5.29798 | 5.93785 | 45.96   | 0.02488 | 38.3771 | 39.8986 | 13.4603 |
| 159 | S1_031  | ANS1569          | yu2017     | control | 0       | 0       | 0.5575  | 0       | 0       | 0.36237 | 16.8274 | 1.24265 | 0.57408 | 0       | 0       | 33.0361 | 9.57441 | 0       | 11.1596 | 35.8453 | 0.03151 | 0       | 70.9393 | 39.1862 |
| 160 | S1_032  | ANS1814          | yu2017     | control | 0       | 1.01499 | 0       | 0.18182 | 0       | 3.1699  | 3.64683 | 1.5429  | 1.82176 | 45.2797 | 0       | 38.669  | 11.2738 | 2.34848 | 3.33616 | 137.995 | 0       | 1.50965 | 68.0885 | 22.8413 |
| 161 | S1_033  | ANS1819          | yu2017     | control | 0       | 0       | 0       | 0       | 0       | 1.57957 | 22.5536 | 0       | 0       | 0.27307 | 0       | 38.5652 | 8.33036 | 2.867   | 0.64124 | 59.8787 | 0       | 0.68468 | 71.2719 | 15.5778 |
| 162 | S1_034  | ANS1963          | yu2017     | control | 1.8286  | 1.38812 | 0       | 0.35407 | 0       | 0.23226 | 6.26588 | 0.27941 | 0       | 0.30791 | 0       | 8.37179 | 9.49702 | 2.5202  | 0.25565 | 59.8027 | 0       | 1.46847 | 20.1378 | 1.68783 |
| 163 | S1_035  | ANS1965          | yu2017     | control | 0       | 0       | 1.20961 | 0       | 0       | 0.33763 | 0.5377  | 1.56373 | 0.39352 | 0       | 0       | 0.85082 | 0       | 0.1835  | 0       | 67.144  | 0       | 0       | 0.67666 | 1.      |

| #   | sequer | sample_nstudy_id | group  | 370640   | 482585  | 1704941 | 2736705 | 3246804 | 1696299 | 2040133 | 2361423 | 3173495 | 181682  | 3531210  | 3976414 | 2211919 | 1804565 | 2206475 | 1559769 | 4256106 | 3611706 | 3319526 | 4171064 |         |
|-----|--------|------------------|--------|----------|---------|---------|---------|---------|---------|---------|---------|---------|---------|----------|---------|---------|---------|---------|---------|---------|---------|---------|---------|---------|
| 172 | S1_045 | ANS2013          | yu2017 | control  | 0       | 0.02067 | 2.1936  | 0       | 0       | 0.03441 | 4.23016 | 0       | 0.07251 | 0        | 18.007  | 0       | 0.17172 | 0.95904 | 39.252  | 0       | 33.0399 | 59.0421 | 43.0338 |         |
| 173 | S1_047 | ANS2016          | yu2017 | control  | 0       | 0.11525 | 0       | 0.18182 | 0       | 1.06129 | 8.85317 | 0.27328 | 0       | 18.5282  | 0       | 0.30536 | 0.53274 | 0       | 0.30932 | 51.776  | 0       | 0       | 0       | 0       |
| 174 | S1_048 | ANS2019          | yu2017 | control  | 96.9552 | 0.23256 | 0.6099  | 0       | 0       | 0.32258 | 16.2659 | 0.27941 | 0       | 7.83898  | 0       | 81.2517 | 6.1875  | 1.63131 | 0       | 81.0654 | 0       | 174.146 | 63.4508 | 32.4582 |
| 175 | S1_049 | ANS2021          | yu2017 | control  | 0       | 0       | 0       | 0       | 0       | 3.02581 | 0.63889 | 1.50735 | 0       | 0.48682  | 0       | 88.2132 | 4.06845 | 4.13468 | 0.55791 | 93.2147 | 5.08707 | 1.09781 | 134.158 | 32.4582 |
| 176 | S1_050 | ANS2023          | yu2017 | control  | 0       | 0       | 0       | 1.01992 | 0.79355 | 0.64087 | 0       | 0.22454 | 1.1968  | 0        | 13.3473 | 7.9107  | 1.28956 | 8.82768 | 25.9627 | 0.53234 | 0       | 8.76945 | 1.82328 |         |
| 177 | S1_051 | ANS2028          | yu2017 | control  | 0       | 0       | 0       | 0.2046  | 0.05269 | 1.40278 | 0.27328 | 0       | 3.58287 | 0        | 84.8927 | 0       | 1.6128  | 2.05932 | 69.588  | 0       | 0       | 131.467 | 49.0571 |         |
| 178 | S1_052 | ANS2034          | yu2017 | control  | 0       | 0.07855 | 0       | 0.33014 | 0       | 1.07849 | 11.7976 | 0.35662 | 0.26389 | 0.908757 | 0       | 107.883 | 10.0595 | 2.88216 | 12.4788 | 117.811 | 0       | 178.996 | 155.456 | 33.1439 |
| 179 | S1_053 | ANS2058          | yu2017 | control  | 0       | 0.69561 | 0       | 0.18182 | 0.16552 | 1.2785  | 3.0496  | 0       | 2.61017 | 0        | 77.4184 | 1.1875  | 2.49326 | 4.93926 | 50.5    | 1.20149 | 48.6229 | 125.098 | 37.6561 |         |
| 180 | S1_054 | M2PK074          | yu2017 | control  | 0       | 0       | 0       | 0.51356 | 0.0613  | 2.70645 | 3.97222 | 0       | 0.21469 | 0        | 44.3706 | 29.2322 | 1.07071 | 0.06356 | 411.609 | 0       | 2.42857 | 65.6609 | 16.2138 |         |
| 181 | S1_057 | M2PK076          | yu2017 | control  | 8.86306 | 6.88268 | 0.10917 | 0       | 0       | 7.56989 | 12.8353 | 0       | 0.22917 | 34.6121  | 0       | 109.989 | 10.1488 | 15.4209 | 1.75282 | 246.375 | 2.05804 | 15.6486 | 159.041 | 60.1777 |
| 182 | S1_058 | M2PK078          | yu2017 | control  | 0       | 0.11783 | 0       | 0       | 2.97635 | 14.0615 | 0.61642 | 0.9375  | 7.37382 | 0        | 85.0244 | 8.4494  | 11.2946 | 16.4929 | 350.561 | 0       | 6.65637 | 107.184 | 30.1555 |         |
| 183 | S1_060 | M2PK079          | yu2017 | control  | 0       | 0.41344 | 0       | 0       | 3.16559 | 1.69841 | 0.74265 | 2.64121 | 0.69115 | 0        | 95.6806 | 12.5238 | 3.94781 | 15.5254 | 154.389 | 0       | 0       | 169.998 | 47.8254 |         |
| 184 | S1_061 | M2PK080          | yu2017 | control  | 0       | 0.09509 | 0       | 0       | 1.0957  | 1.7996  | 0.27941 | 0       | 0       | 0        | 7.87295 | 23.6607 | 35.8653 | 0       | 367.679 | 0       | 0       | 1.36688 | 1.42751 |         |
| 185 | S1_062 | M2PK082          | yu2017 | control  | 147.742 | 0.14625 | 0       | 0       | 1.14409 | 0.59722 | 2.41054 | 1.81481 | 0       | 9.65407  | 59.2039 | 4.65774 | 9.76262 | 8.51695 | 234.465 | 0.02571 | 0       | 127.735 | 48.9545 |         |
| 186 | S1_064 | M2PK084          | yu2017 | control  | 0       | 0.30853 | 0       | 0       | 6.15484 | 7.2619  | 0.55637 | 0.52778 | 1.91055 | 0        | 75.5664 | 25.3839 | 25.6549 | 3.26695 | 466.073 | 0       | 15.713  | 114.678 | 27.5831 |         |
| 187 | S1_065 | M2PK085          | yu2017 | control  | 0       | 3.7783  | 0.14265 | 2.98883 | 7.16169 | 1.06237 | 10.6389 | 5.32844 | 2.75926 | 0        | 18.4744 | 0.10417 | 5.29798 | 0.42938 | 420.037 | 0       | 0       | 18      | 2.88677 |         |
| 188 | S1_066 | M2PK142          | yu2017 | control  | 0       | 0.07494 | 0       | 0       | 9.50646 | 2.35119 | 0.27206 | 0       | 48.4369 | 0        | 164.594 | 7.27381 | 5.59259 | 0.97881 | 189.239 | 0       | 0       | 228.087 | 61.6349 |         |
| 189 | S1_067 | M2PK054          | yu2017 | control  | 0       | 0.78398 | 0       | 3.30622 | 0.059   | 4.2957  | 2       | 2.1348  | 2.97454 | 3.78625  | 0       | 129.564 | 16.4018 | 16.5471 | 0       | 322.945 | 0       | 0       | 206.667 | 74.5164 |
| 190 | S1_068 | M2PK054          | yu2017 | control  | 7.26873 | 0.31783 | 0       | 0.17863 | 0       | 0.62796 | 28.0655 | 0.31863 | 1.46991 | 50.3164  | 4.67583 | 240.4   | 23.875  | 151.082 | 0       | 581.64  | 0       | 0.24968 | 412.016 | 185.263 |
| 191 | S1_069 | M2PK055          | yu2017 | control  | 0       | 0.02067 | 0       | 0       | 0.68889 | 0.46774 | 35.5833 | 2.70711 | 2.10648 | 0        | 43.4557 | 141.518 | 0.38384 | 5.84181 | 510.165 | 0       | 4.62677 | 65.1849 | 32.4148 |         |
| 192 | S1_070 | M2PK055          | yu2017 | control  | 0       | 0.04134 | 0       | 0.07496 | 0.42605 | 1.57527 | 1.93056 | 0.38848 | 0       | 18.1582  | 0       | 148.413 | 11.4107 | 8.00336 | 41.5523 | 112.191 | 0       | 1.95882 | 222.775 | 45.6159 |
| 193 | S1_071 | M2PK060          | yu2017 | control  | 0       | 0.76589 | 0.10772 | 0.53907 | 0       | 1.13333 | 82.5972 | 2.86765 | 2.85649 | 0        | 0       | 1.74009 | 0       | 1.48822 | 5.4082  | 143.813 | 0       | 0       | 0.57459 | 0       |
| 194 | S1_072 | M2PK063          | yu2017 | control  | 0       | 1.70749 | 0       | 2.24243 | 0       | 1.32581 | 34.3929 | 0.55882 | 1.18287 | 1.29944  | 0       | 93.3799 | 0       | 0.82155 | 2.12288 | 175.104 | 0       | 0       | 130.172 | 84.6634 |
| 195 | S1_073 | M2PK064          | yu2017 | control  | 0.72954 | 0.72351 | 0       | 0       | 4.22366 | 4.93255 | 0.45833 | 1.50463 | 3.14407 | 0        | 115.734 | 17.2679 | 7.24074 | 1.85028 | 145.171 | 0       | 0.93179 | 201.526 | 77.9597 |         |
| 196 | S1_074 | M2PK065          | yu2017 | control  | 0       | 0.46822 | 0       | 1.48804 | 0       | 1.93656 | 2.18055 | 0.61152 | 0.57176 | 16.1591  | 0       | 171.916 | 25.4078 | 10.5572 | 31.3023 | 301.247 | 0       | 9.0785  | 234.647 | 49.9576 |
| 197 | S1_075 | M2PK066          | yu2017 | non_adva | 0.72696 | 0.21344 | 0       | 0.36364 | 0       | 4.90215 | 60.748  | 0.69363 | 0.78009 | 1.08851  | 0       | 71.8916 | 5.57143 | 3.17003 | 12.3333 | 215.744 | 0       | 0       | 109.586 | 33.0233 |
| 198 | S1_077 | M2PK077          | yu2017 | control  | 0       | 0.10336 | 0       | 0.23923 | 0       | 2.55914 | 2.56151 | 1.55882 | 1.2963  | 0.26083  | 0       | 315.659 | 0       | 8.86363 | 10.9506 | 326.847 | 1.53234 | 1.63063 | 491.135 | 96.1862 |
| 199 | S1_078 | M2PK082          | yu2017 | control  | 0       | 0       | 0       | 0       | 4.64946 | 1.14881 | 0.27941 | 0       | 2.98117 | 0        | 83.2051 | 1.99107 | 6.03535 | 37.2839 | 185.191 | 0.56219 | 0       | 105.711 | 25.8857 |         |
| 200 | S1_079 | M2PK083          | yu2017 | control  | 0.13867 | 0.23359 | 0       | 0.36364 | 0       | 5.98602 | 348.385 | 0.27941 | 0.34259 | 0.19303  | 0       | 48.9184 | 0       | 14.4697 | 1.4548  | 66.3494 | 0       | 0.22283 | 83.0464 | 48.473  |
| 201 | S1_081 | M2PK050          | yu2017 | control  | 0       | 0.94419 | 0.30277 | 0.17544 | 0.46054 | 1.93979 | 4.12302 | 7.34191 | 6.39583 | 0        | 0       | 11.197  | 0.10417 | 3.7761  | 2.93927 | 568.888 | 3.16915 | 0       | 13.7645 | 17.9936 |
| 202 | S1_083 | M2PK111          | yu2017 | control  | 0       | 1.25116 | 0       | 0.54545 | 1.0774  | 0.85591 | 2.0873  | 0       | 0       | 1.38041  | 0       | 36.2214 | 8.75596 | 10.0757 | 32.1144 | 190.784 | 0       | 5.47619 | 75.5953 | 25.3175 |
| 203 | S1_084 | M2PK141          | yu2017 | control  | 0       | 0       | 0       | 0       | 0.53441 | 4.29564 | 0.62623 | 0.97917 | 4.38324 | 0        | 171.615 | 1.53869 | 4.21885 | 6.70764 | 152.341 | 0       | 0.37709 | 228.506 | 40.1545 |         |
| 204 | S1_086 | M2PK148          | yu2017 | control  | 8.63135 | 0       | 0.65939 | 0.36364 | 0       | 7.03871 | 1.83135 | 5.68137 | 4.78703 | 0.22976  | 0       | 102.134 | 0       | 0.74916 | 0       | 137.119 | 0       | 0       | 214.763 | 197.062 |
| 205 | S1_087 | M2PK050          | yu2017 | control  | 0       | 0       | 0       | 0       | 3.3043  | 79.9822 | 0       | 0       | 2.64219 | 0        | 53.43   | 11.1488 | 8.39731 | 2.43644 | 291.355 | 0       | 0.10682 | 70.5303 | 22.4804 |         |
| 206 | S1_088 | M2PK050          | yu2017 | control  | 0       | 0       | 0       | 0       | 2.60753 | 3.59723 | 23.5735 | 20.8704 | 0.52354 | 0        | 68.3613 | 20.1994 | 13.6094 | 0.15396 | 417.689 | 0.5     | 5.30115 | 72.2263 | 11.7238 |         |
| 207 | S1_089 | M2PK051          | yu2017 | control  | 19.4065 | 0.05633 | 0       | 0       | 6.17204 | 13.0893 | 0.55637 | 0.18056 | 8.79002 | 0        | 60.6258 | 2.12798 | 13.6784 | 0.55367 | 255.469 | 0       | 3.95753 | 101.602 | 45.0476 |         |
| 208 | S1_089 | M2PK051          | yu2017 | control  | 0       | 0       | 0       | 0.08506 | 0       | 1.63691 | 0       | 0       | 1.11394 | 0        | 10.5594 | 1.13095 | 3.89225 | 3.68644 | 132.575 | 0       | 0       | 46.7587 | 18.91   |         |
| 209 | S1_091 | M2PK124          | yu2017 | control  | 0       | 0.17623 | 0       | 0.70813 | 0       | 3.14516 | 35.875  | 1.73897 | 1.13889 | 0.60546  | 0       | 31.8508 | 12.1964 | 7.30134 | 7.15678 | 174.995 | 0.18906 | 0.24453 | 47.3084 | 25.3334 |
| 210 | S1_092 | M2PK138          | yu2017 | control  | 0       | 0.01602 | 0.63028 | 0       | 0       | 1.36452 | 0.84524 | 8.84313 | 9.03935 | 0.74859  | 0       | 160.74  | 12.4613 | 2.22559 | 0.15678 | 323.58  | 0       | 0       | 277.096 | 214.952 |
| 211 | S1_093 | M2PK156          | yu2017 | control  | 0       | 1.64496 | 0.70015 | 0.52951 | 1.58391 | 3.62473 | 11.8631 | 1.62132 | 1.16667 | 0.2759   | 0       | 100.108 | 41.3423 | 5.14815 | 16.7203 | 291.785 | 0       | 0       | 169.374 | 62.7185 |
| 212 | S1_094 | M2PK156          | yu2017 | control  | 0       | 0       | 0       | 0       | 9.89462 | 26.5933 | 0.55025 | 0.76389 | 2.29096 | 0        | 47.4335 | 21.9405 | 8.09427 | 0.92797 | 504.928 | 0       | 2.75804 | 58.666  | 9.52592 |         |
| 213 | S1_095 | A0047            | yu2017 | control  | 0       | 0.97416 | 0.85881 | 0       | 0       | 1.20968 | 121.274 | 0.83824 | 1.05093 | 3.39172  | 0       | 1.67716 | 8.72025 | 7.08754 | 0.5678  | 200.659 | 0       | 0       | 0.42184 | 0       |
| 214 | S1_097 | A0117            | yu2017 | non_adva | 0.19638 | 0.13178 | 0       | 0       | 7.15485 | 5.66865 | 0       | 0       | 27.5895 | 0        | 70.6049 | 48.6578 | 24.4545 | 23.1342 | 504.824 | 0       | 0       | 111.425 | 73      |         |
| 215 | S1_098 | A0121            | yu2017 | non_adva | 0.19638 | 0.02119 | 0       | 0       | 0.29885 | 5.92366 | 1.73214 | 1.58456 | 2.06944 | 0.22411  | 0       | 169.049 | 22.6488 | 6.41919 | 23.3249 | 193.984 | 0       | 0.18018 | 261.808 | 94.91   |
| 216 | S1_100 | A0137            | yu2017 | control  | 0       | 0.80724 | 0       | 0       | 1.43226 | 3.49603 | 4.11642 | 2.12963 | 0.41337 | 0        | 1.44522 | 0       | 0.32492 | 0       | 381.493 | 0       | 0       | 0       | 0.04233 |         |
| 217 | S1_102 | A0140            | yu2017 | control  | 0       | 5.72507 | 0       | 5.85486 | 0       | 1.75591 | 6.77579 | 0       | 0.90278 | 2.46234  | 0       | 53.9708 | 8.77082 | 17.6751 | 0.81638 | 323.761 | 0       | 5.08365 | 71.0393 | 14.8783 |
| 218 | S1_105 | A0204            | yu2017 | control  | 0.03445 | 0.27028 | 0.09898 | 0       | 2.07816 | 1.59677 | 23.3651 | 2.82966 | 1.14815 | 10.0414  | 0       | 98.7039 | 22.5536 | 1.69024 | 10.9463 | 460.26  | 0       | 0       | 200.305 | 178.186 |
| 219 | S1_106 | A0254            | yu2017 | control  | 0       | 0.01602 | 0       | 0       | 1.85161 | 2.34921 | 0.13971 | 0.26389 | 3.66573 | 0        | 61.4137 | 36.8125 | 20.0926 | 25.3616 | 371.893 | 0.56385 | 1.37838 | 106.98  | 24.6857 |         |
| 220 | S1_107 | A0284            | yu2017 | control  | 0       | 0       | 0.88938 | 0       | 0       | 2.04516 | 1.61111 | 0       | 0.11343 | 17.1525  | 0       | 35.8286 |         |         |         |         |         |         |         |         |

| #   | sequer | sample_nstudy_id | group  | 370640   | 482585  | 1704941 | 2736705 | 3246804 | 1696299 | 2040133  | 2361423 | 3173495 | 181682  | 3531210 | 3976414 | 2211919 | 1804565 | 2206475 | 1559769 | 4256106 | 3611706 | 3319526 | 4171064 |         |
|-----|--------|------------------|--------|----------|---------|---------|---------|---------|---------|----------|---------|---------|---------|---------|---------|---------|---------|---------|---------|---------|---------|---------|---------|---------|
| 229 | S1_116 | A0401            | yu2017 | control  | 0       | 0.50439 | 0.33188 | 0.17703 | 0       | 1.14086  | 34.8829 | 0       | 16.0443 | 0       | 29.3147 | 53.6935 | 0.91751 | 0       | 269.775 | 0       | 0       | 65.8837 | 37.6465 |         |
| 230 | S1_118 | A0407            | yu2017 | control  | 0       | 1.23204 | 1.27365 | 0.1579  | 0       | 0.65699  | 6.96429 | 0.98407 | 0.62963 | 32.4265 | 0       | 95.2564 | 15.1934 | 15.4327 | 11.1384 | 254.787 | 0       | 1.16731 | 175.31  | 64.236  |
| 231 | S1_120 | A0443            | yu2017 | control  | 0       | 1.4186  | 0       | 0       | 0       | 1.83226  | 46.25   | 0.61397 | 0.25694 | 1.08663 | 0       | 220.929 | 77.0625 | 2.633   | 35.9929 | 523.259 | 0       | 0       | 302.807 | 105.77  |
| 232 | S1_121 | M2PK050          | yu2017 | control  | 0       | 0.21705 | 0       | 0       | 0.26054 | 2.81721  | 14.6528 | 0.31863 | 0.10648 | 2.1855  | 0       | 62.9149 | 126.818 | 24.0909 | 0.62994 | 529.902 | 0       | 0       | 89.0421 | 19.6465 |
| 233 | S1_122 | M2PK050          | yu2017 | control  | 0       | 0       | 0       | 0       | 0       | 0.54301  | 0.42262 | 0.47427 | 1.22454 | 0.68738 | 0       | 109.219 | 9.18452 | 4.08754 | 1.89972 | 281.343 | 0       | 0       | 173.04  | 40.8741 |
| 234 | S1_123 | M2PK050          | yu2017 | control  | 0       | 0       | 0       | 0       | 0       | 0.48925  | 3.05357 | 1.37377 | 0.50463 | 0       | 0       | 76.0594 | 29.6012 | 13.6498 | 13.4011 | 398.879 | 0       | 3.57915 | 136.388 | 67.436  |
| 235 | S1_124 | M2PK051          | yu2017 | control  | 0       | 0.04651 | 0       | 0.36364 | 0       | 1.31613  | 13.6091 | 1.98162 | 0.99537 | 0       | 0       | 39.8741 | 0.5     | 30.7508 | 3.62853 | 437.94  | 0       | 0       | 72.1221 | 67.1089 |
| 236 | S1_125 | M2PK052          | yu2017 | control  | 1.03445 | 0       | 0       | 0       | 0       | 10.1129  | 5.78571 | 0       | 0.1875  | 17.37   | 0       | 84.8496 | 42.7619 | 6.03704 | 19.0621 | 324.028 | 0       | 72.9806 | 105.527 | 36.3502 |
| 237 | S1_126 | M2PK052          | yu2017 | control  | 0       | 0       | 0       | 0       | 0       | 6.86559  | 5.47818 | 0.63358 | 0.9375  | 9.95669 | 0       | 170.686 | 37.7381 | 16.4007 | 13.7246 | 330.528 | 0       | 67.2265 | 265.877 | 68.4603 |
| 238 | S1_127 | M2PK052          | yu2017 | control  | 0.29199 | 8.59276 | 0       | 4.14354 | 0       | 5.66452  | 27.0913 | 0.41054 | 0       | 0.59793 | 0       | 9.91841 | 52.3006 | 3.21212 | 0       | 54.4187 | 0       | 5.58559 | 9.9015  | 5.3492  |
| 239 | S1_128 | M2PK053          | yu2017 | control  | 0       | 0       | 0       | 0       | 0       | 12.4602  | 10.2123 | 0.27941 | 0.78472 | 3.14219 | 0       | 109.634 | 12.5714 | 23.4444 | 15.2839 | 371.584 | 0       | 19.6448 | 155.258 | 31.5862 |
| 240 | S1_130 | M2PK057          | yu2017 | control  | 0       | 0.13592 | 0       | 0.17065 | 0       | 0.32473  | 16.5893 | 0.13971 | 0.26157 | 42.2034 | 0       | 94.7552 | 15.6667 | 6.87879 | 15.2076 | 232.505 | 0       | 3.56628 | 114.684 | 47.7577 |
| 241 | S1_132 | M2PK062          | yu2017 | control  | 0       | 0       | 0       | 0.54226 | 0       | 10.0785  | 11.7202 | 1.34804 | 0       | 12.0584 | 0       | 2.12471 | 0.25    | 2.39226 | 13.3305 | 79.052  | 0       | 0       | 0.15846 | 0       |
| 242 | S2_003 | M2PK094          | yu2017 | non_adva | 0       | 2.30129 | 0       | 1.94418 | 0       | 0.202473 | 1.37698 | 1.56005 | 1.52546 | 31.3013 | 0       | 42.0256 | 4.66071 | 1.67845 | 0.69633 | 74.1907 | 0       | 0       | 65.2648 | 33.0116 |
| 243 | S2_004 | M2PK081          | yu2017 | non_adva | 0.03273 | 0       | 0       | 0       | 0       | 4.35054  | 2.12302 | 0       | 0       | 19.5951 | 0       | 68.5116 | 15.4316 | 19.1195 | 1.0226  | 113.893 | 1.76285 | 19.4839 | 62.3655 | 24.1047 |
| 244 | S2_005 | M2PK072          | yu2017 | control  | 0       | 0.6124  | 0.26929 | 0       | 0       | 6.03119  | 1.60913 | 0.27696 | 0       | 0.77495 | 0       | 224.374 | 9.06548 | 7.51515 | 2.27401 | 232.967 | 3.30017 | 5.29601 | 385.623 | 105.365 |
| 245 | S2_006 | M2PK082          | yu2017 | non_adva | 3.09216 | 0.09302 | 0       | 0       | 0.06897 | 1.25591  | 1.86905 | 0       | 0       | 2.72693 | 0       | 133.438 | 15.3601 | 8.14815 | 8.44633 | 222.497 | 0       | 26.6512 | 207.639 | 57.327  |
| 246 | S2_007 | M2PK087          | yu2017 | control  | 1.69595 | 0       | 0       | 0       | 0       | 1.33979  | 4.39286 | 0       | 0       | 24.1017 | 0       | 105.654 | 3.28274 | 6.56566 | 30.8757 | 97.0307 | 0.06385 | 1.88417 | 131.415 | 36.1069 |
| 247 | S2_009 | M2PK082          | yu2017 | non_adva | 0.06546 | 0.50853 | 2.32169 | 0       | 0       | 0.04194  | 8.15277 | 0       | 0       | 0.46045 | 0       | 69.7377 | 17.3691 | 5.09764 | 5.12006 | 207.956 | 0       | 0.6538  | 84.2634 | 11.6751 |
| 248 | S2_010 | M2PK093          | yu2017 | non_adva | 0       | 0.35246 | 0.48035 | 0.51834 | 0.06897 | 0.38495  | 61.0357 | 0       | 0       | 0       | 0       | 0.43124 | 0       | 0.09428 | 0       | 63.1987 | 0       | 0       | 0.04568 | 0       |
| 249 | S2_011 | M2PK086          | yu2017 | non_adva | 0       | 0.04806 | 0       | 3.75758 | 0       | 0.18817  | 2.79365 | 0       | 0       | 5.46516 | 0       | 62.2785 | 8.91666 | 8.83838 | 5.37288 | 88.0187 | 0       | 16.1287 | 118.087 | 42.3873 |
| 250 | S2_012 | M2PK073          | yu2017 | non_adva | 0       | 4.48734 | 0       | 0.36204 | 0       | 0.13763  | 0       | 0       | 0       | 18.7495 | 0       | 91.7109 | 6.5     | 14.7138 | 0.91667 | 147.943 | 0       | 2.63578 | 112.485 | 31.5661 |
| 251 | S2_013 | M2PK081          | yu2017 | non_adva | 0       | 0.67959 | 0       | 0       | 0       | 5.44301  | 2.96627 | 0       | 0       | 4.36723 | 0       | 40.0571 | 3.77084 | 2.52862 | 2.99294 | 142.347 | 0.02571 | 11.5251 | 52.3583 | 13.7746 |
| 252 | S2_014 | M2PK096          | yu2017 | non_adva | 0       | 0.11783 | 0.08443 | 0.18182 | 0.08736 | 1.0129   | 2.16865 | 0.04289 | 0.37731 | 7.18927 | 0       | 122.961 | 6.55655 | 2.60269 | 24.6455 | 135.772 | 10.9602 | 285.378 | 210.769 | 90.6581 |
| 253 | S2_015 | M2PK070          | yu2017 | non_adva | 0       | 0       | 0       | 0       | 0.47893 | 0.36344  | 11.6488 | 0.41789 | 0.26157 | 0.56026 | 0       | 14.6585 | 2.87202 | 1.77273 | 4.36865 | 76.816  | 0       | 7.19305 | 29.8472 | 34.7905 |
| 254 | S2_016 | M2PK080          | yu2017 | non_adva | 0       | 0.40724 | 6.03492 | 0.72568 | 0       | 0.76452  | 21.7163 | 0       | 0       | 0.67891 | 0       | 27.9021 | 0       | 0.06902 | 1.69209 | 92.02   | 0       | 0       | 58.1899 | 61.1354 |
| 255 | S2_017 | M2PK085          | yu2017 | non_adva | 0       | 1.48682 | 0.74963 | 0       | 0       | 4.0043   | 9.94643 | 0.27819 | 0       | 10.7194 | 0       | 73.3146 | 28.1816 | 13.2239 | 1.09322 | 325.384 | 1.73881 | 0.14672 | 121.16  | 46.3788 |
| 256 | S2_018 | M2PK090          | yu2017 | control  | 0       | 3.54876 | 0       | 0       | 0       | 2.66882  | 0.45238 | 0.22427 | 0       | 1.69774 | 0       | 45.6247 | 2.25298 | 2.03367 | 13.1893 | 78.916  | 0       | 0.34878 | 68.6488 | 13.1757 |
| 257 | S2_019 | M2PK096          | yu2017 | non_adva | 0       | 0.94574 | 1.4032  | 1.59011 | 0       | 0.71075  | 11.9306 | 0.97794 | 1.71991 | 0.64313 | 0       | 9.78904 | 0       | 0.88384 | 0       | 86.8373 | 0       | 0       | 13.3412 | 17.7883 |
| 258 | S2_020 | M2PK095          | yu2017 | non_adva | 0.27476 | 0.01602 | 0       | 0       | 0       | 12.5419  | 17.1825 | 0.83824 | 0       | 4.34557 | 0       | 286.369 | 7.63989 | 10.67   | 10.202  | 134.42  | 2.77198 | 30.1621 | 364.11  | 84.656  |
| 259 | S2_021 | M2PK086          | yu2017 | non_adva | 0       | 0.22791 | 0       | 0.43222 | 0       | 1.10538  | 1.54961 | 0.27819 | 0       | 8.05744 | 0       | 54.5629 | 6.65476 | 4.65825 | 1.39124 | 147.811 | 0       | 0.14672 | 111.984 | 14.0899 |
| 260 | S2_022 | M2PK083          | yu2017 | non_adva | 0       | 0       | 0       | 0       | 0       | 0.61398  | 0.35714 | 0.27941 | 0       | 3.53955 | 0       | 96.7027 | 6.21226 | 23.2997 | 2.61441 | 159.2   | 2.85655 | 8.98069 | 138.32  | 42.0603 |
| 261 | S2_024 | M2PK089          | yu2017 | non_adva | 0       | 3.59638 | 0       | 2.47687 | 0       | 3.33226  | 8.35516 | 1.50613 | 1.69213 | 8.2533  | 0       | 96.3729 | 0       | 4.33838 | 7.72458 | 222.593 | 0       | 326.195 | 156.376 | 35.292  |
| 262 | S2_025 | M2PK091          | yu2017 | non_adva | 0       | 16.6398 | 0       | 4.63796 | 0       | 0        | 6.36111 | 0       | 0       | 0       | 0       | 0.7634  | 0       | 1.60269 | 3.62006 | 1.25733 | 0       | 0       | 0.04568 | 0       |
| 263 | S2_026 | M2PK097          | yu2017 | control  | 0       | 0       | 0.13537 | 0       | 0       | 3.85699  | 22.756  | 0       | 0.52778 | 1.30697 | 0       | 52.014  | 5.35417 | 7.54545 | 1.91384 | 138.155 | 0.46932 | 2.03732 | 71.5353 | 20.9481 |
| 264 | S2_027 | M2PK098          | yu2017 | non_adva | 0       | 25.8336 | 0.52693 | 11.5582 | 0.34789 | 0.68495  | 7.12897 | 0       | 0       | 0.73635 | 0       | 11.0746 | 0       | 3.60437 | 5.06356 | 11.2733 | 0       | 0       | 21.6916 | 5.11428 |
| 265 | S2_027 | M2PK098          | yu2017 | non_adva | 0.69595 | 0.58812 | 0       | 0       | 0       | 0.88495  | 38.7381 | 0       | 0       | 31.9501 | 0       | 62.4394 | 10.0565 | 6.76767 | 35.9195 | 150.983 | 0       | 1.15701 | 99.9143 | 33.2423 |
| 266 | S2_028 | M2PK099          | yu2017 | control  | 0       | 0.81499 | 0       | 0.36364 | 0       | 1.55699  | 4.36707 | 0       | 0       | 10.838  | 0       | 65.8601 | 7.73809 | 8.46296 | 6.72881 | 102.236 | 1.44361 | 0       | 127.24  | 48.8571 |
| 267 | S2_030 | M2PK100          | yu2017 | non_adva | 0       | 0.46357 | 0       | 0       | 0       | 0.71183  | 1.91071 | 0       | 0       | 0.08004 | 0       | 19.4394 | 0       | 4.3771  | 0       | 63.5587 | 0       | 17.121  | 24.586  | 7.5873  |
| 268 | S2_031 | M2PK100          | yu2017 | non_adva | 0       | 0.65581 | 0.28239 | 1.15311 | 0       | 0.14301  | 7.30357 | 0       | 0.09491 | 0.4548  | 0       | 7.39627 | 0       | 2.10606 | 0.57486 | 13.3613 | 0       | 21.1158 | 13.8872 | 7.74391 |
| 269 | S2_032 | M2PK100          | yu2017 | non_adva | 0       | 0.60414 | 0       | 0.70813 | 0.52184 | 0.2785   | 6.35515 | 0       | 0.52083 | 4.47551 | 0       | 53.937  | 0.32738 | 4.10943 | 0       | 159.021 | 0       | 0       | 96.7302 | 23.2529 |
| 270 | S2_033 | M2PK101          | yu2017 | non_adva | 0       | 0.1385  | 0       | 0       | 0       | 1.43011  | 0.76191 | 0.41667 | 0       | 66.2043 | 0       | 49.1189 | 3.87797 | 2.1431  | 0.08192 | 84.1854 | 0       | 19.1197 | 72.8765 | 12.7778 |
| 271 | S2_035 | M2PK102          | yu2017 | control  | 0       | 0.87132 | 0       | 0.60287 | 0.34943 | 2.14194  | 3.53968 | 0.11765 | 0       | 0.31827 | 0       | 13.1725 | 2.01488 | 5.55219 | 0.46328 | 26.8533 | 0       | 77.4182 | 12.4183 | 5.01799 |
| 272 | S2_036 | M2PK102          | yu2017 | control  | 0       | 1       | 0.88646 | 1.77512 | 0       | 1.31936  | 25.8591 | 0.25613 | 0       | 8.26648 | 0       | 158.15  | 16.0179 | 3.133   | 2.71751 | 249.981 | 0       | 0       | 229.763 | 42.9672 |
| 273 | S2_037 | M2PK103          | yu2017 | control  | 0       | 6.78243 | 0.22999 | 1.72727 | 0.17471 | 1.37742  | 29.0337 | 0       | 0       | 0.09605 | 0       | 11.7075 | 0       | 6.42593 | 0       | 58.64   | 0       | 0       | 0.31692 | 0       |
| 274 | S2_038 | M2PK105          | yu2017 | non_adva | 0.39276 | 0       | 0       | 0       | 0       | 2.25376  | 3.48016 | 1.9473  | 0.32176 | 16.7731 | 0       | 188.953 | 19.8184 | 7.06903 | 12.815  | 181.08  | 0       | 8.54183 | 239.234 | 54.0137 |
| 275 | S2_039 | M2PK105          | yu2017 | non_adva | 0       | 0.15246 | 0       | 0       | 0       | 1.14946  | 0       | 0       | 0       | 3.4548  | 0       | 71.2109 | 7.24108 | 5.45454 | 5.2048  | 108.887 | 0       | 19.4247 | 94.2191 | 12.054  |
| 276 | S2_040 | M2PK105          | yu2017 | control  | 7.79156 | 0.4124  | 0       | 0.53748 | 0       | 0.64516  | 3.30952 | 0       | 0       | 0.57062 | 0       | 23.9277 | 7.74107 | 2.26094 | 0.77542 | 76.7507 | 0       | 0       | 43.409  | 8.97248 |
| 277 | S2_043 | M2PK107          | yu2017 | non_adva | 0       | 1.72868 | 0       | 0.54545 | 0       | 5.37204  | 50.4722 | 0.236   |         |         |         |         |         |         |         |         |         |         |         |         |

| #   | sequer | sample_nstudy_id | group  | 370640   | 482585  | 1704941 | 2736705 | 3246804 | 1696299 | 2040133  | 2361423 | 3173495 | 181682  | 3531210 | 3976414 | 2211919 | 1804565 | 2206475 | 1559769 | 4256106 | 3611706 | 3319526 | 4171064 |         |
|-----|--------|------------------|--------|----------|---------|---------|---------|---------|---------|----------|---------|---------|---------|---------|---------|---------|---------|---------|---------|---------|---------|---------|---------|---------|
| 286 | S2_053 | M2PK113          | yu2017 | control  | 0       | 1.37261 | 0       | 0.53589 | 1.12107 | 3.12043  | 1.53373 | 0       | 0       | 0.44068 | 0       | 45.1317 | 8.99702 | 1.93434 | 5.25283 | 117.505 | 0       | 8.93436 | 87.3198 | 52.7502 |
| 287 | S2_054 | M2PK114          | yu2017 | non_adv  | 0       | 1.1571  | 0       | 0       | 0       | 2.00753  | 11.383  | 0       | 0       | 4.94068 | 0       | 64.3076 | 11.6339 | 2.50168 | 0.75    | 91.8787 | 0       | 127.14  | 73.0635 | 12.4762 |
| 288 | S2_055 | M2PK115          | yu2017 | non_adv  | 0       | 0       | 0       | 0.90909 | 0       | 0.63656  | 34.1349 | 0       | 0       | 5.04332 | 0       | 0.38811 | 0       | 4.99832 | 0.88701 | 20.264  | 0       | 0       | 0.10493 | 0       |
| 289 | S2_057 | M2PK117          | yu2017 | non_adv  | 0       | 0.11731 | 2.03202 | 0       | 0       | 0.98817  | 0.35532 | 0       | 0       | 0.57815 | 0       | 0.09324 | 0       | 0.23232 | 0       | 23.7547 | 0       | 0       | 0.02356 | 0       |
| 290 | S2_058 | M2PK117          | yu2017 | non_adv  | 0.18346 | 0       | 0       | 0       | 0       | 4.87527  | 20.2202 | 0       | 0       | 1.48399 | 0       | 31.014  | 14.6607 | 18.096  | 12.4223 | 238.908 | 0       | 4.3758  | 48.9315 | 14.8    |
| 291 | S2_059 | M2PK117          | yu2017 | non_adv  | 0       | 0.02067 | 0       | 0       | 0       | 0.107527 | 8.14683 | 0.4473  | 0.20602 | 14.6949 | 0       | 105.354 | 5.46726 | 4.67846 | 4.15395 | 84.9    | 0       | 133.938 | 152.495 | 56.4931 |
| 292 | S2_060 | M2PK117          | yu2017 | non_adv  | 0       | 0.24755 | 0.09898 | 0       | 0       | 0.29032  | 3.95635 | 0       | 0       | 12.2269 | 0       | 53.4802 | 2.02976 | 2.09933 | 12.7698 | 103.273 | 0       | 0       | 128.225 | 65.8529 |
| 293 | S2_061 | M2PK117          | yu2017 | non_adv  | 5.39621 | 0       | 0.38282 | 0       | 0       | 4.0785   | 2.73016 | 0       | 0.5162  | 5.28625 | 3.10653 | 98.7004 | 17.4792 | 11.1768 | 4.74859 | 114.389 | 10.4428 | 0.06435 | 176.176 | 41.9174 |
| 294 | S2_062 | M2PK119          | yu2017 | advanced | 0       | 0       | 0.2722  | 0       | 0       | 0.04946  | 0.07738 | 0.13971 | 0.26389 | 1.21563 | 0       | 46.2098 | 3.76786 | 1.66835 | 23.9802 | 131.403 | 0       | 0       | 69.5653 | 18.3153 |
| 295 | S2_063 | M2PK123          | yu2017 | advanced | 0       | 0       | 0.11499 | 0       | 0       | 0.06237  | 1.48214 | 0       | 0       | 0.49153 | 0       | 48.4394 | 0       | 2.5     | 0       | 74.588  | 3.02819 | 0       | 82.0728 | 33.8169 |
| 296 | S2_064 | M2PK128          | yu2017 | advanced | 0       | 0       | 0.69869 | 0       | 0       | 1.09032  | 4.9742  | 0       | 0       | 2.53201 | 0       | 73.275  | 1.32143 | 6.80135 | 0.88418 | 77.5173 | 0.77861 | 2.63449 | 114.453 | 24.5439 |
| 297 | S3_002 | ANS0058          | yu2017 | advanced | 0       | 0.06202 | 0       | 0       | 0       | 1.59247  | 1.88492 | 0       | 0       | 0.22411 | 0       | 27.9242 | 0.24405 | 0.53704 | 0.38842 | 8.43467 | 0       | 6.67181 | 32.6303 | 5.69947 |
| 298 | S3_005 | ANS1742          | yu2017 | advanced | 240.359 | 0.81705 | 0       | 0.78469 | 2.01303 | 0.58172  | 47.256  | 2.0625  | 1.3912  | 0.4774  | 16.4444 | 99.0885 | 176.622 | 21.0151 | 59.928  | 724.086 | 0       | 149.707 | 105.477 | 34.6561 |
| 299 | S3_007 | ANS1779          | yu2017 | non_adv  | 0       | 2.41654 | 0.43377 | 0.54546 | 0       | 0.56774  | 3.125   | 1.11765 | 1.75694 | 28.2712 | 0       | 211.514 | 5.8125  | 13.8384 | 2.83757 | 113.471 | 0       | 13.39   | 381.219 | 292.293 |
| 300 | S3_008 | ANS1780          | yu2017 | non_adv  | 0       | 0.23204 | 0.16448 | 0       | 0       | 0.62903  | 2.88889 | 0.27941 | 0       | 3.87571 | 0       | 57.1725 | 6.41667 | 7.96801 | 2.51695 | 82.5613 | 0       | 2.9009  | 95.748  | 24.6339 |
| 301 | S3_009 | ANS1781          | yu2017 | advanced | 0       | 3.21499 | 0       | 0.18182 | 0       | 0        | 13.5496 | 0       | 0       | 1.08569 | 0       | 38.2133 | 0.31548 | 0.6734  | 0       | 21.9147 | 0       | 0       | 46.01   | 12.237  |
| 302 | S3_010 | ANS1787          | yu2017 | advanced | 0       | 0       | 1.18486 | 0       | 0       | 0.67204  | 2.97421 | 0       | 0       | 0.66102 | 0       | 57.8135 | 2.65774 | 2.71044 | 0.71469 | 46.5826 | 0       | 0.07722 | 95.5439 | 22.6476 |
| 303 | S3_011 | ANS1872          | yu2017 | advanced | 0       | 0.82532 | 0.39592 | 0.34769 | 0.16858 | 0.67527  | 14.1766 | 0.55882 | 0.80787 | 7.32956 | 0       | 115.297 | 7.56845 | 16.9613 | 1.36723 | 187.416 | 4.30017 | 16.8108 | 160.689 | 41.2275 |
| 304 | S3_013 | ANS2111          | yu2017 | advanced | 0       | 1.80672 | 0       | 0.18182 | 0       | 3.96989  | 16.2897 | 0       | 0       | 7.06403 | 0       | 35.3193 | 2.16964 | 5.23905 | 0.65819 | 35.8573 | 0       | 0       | 69.2377 | 24.4571 |
| 305 | S3_014 | ANS2134          | yu2017 | advanced | 0       | 0.02067 | 0       | 0       | 0       | 1.13118  | 2.35913 | 0.83701 | 0.37732 | 0.29944 | 0       | 49.4837 | 3.48512 | 4.08586 | 0.20763 | 45.5693 | 0       | 29      | 70.8579 | 42.2085 |
| 306 | S3_016 | ANS2491          | yu2017 | non_adv  | 0       | 0.06202 | 0       | 0       | 0       | 0.62903  | 0       | 0       | 0       | 0.61959 | 0       | 50.5501 | 4.25893 | 2.22727 | 25.2401 | 18.48   | 0       | 0.13514 | 54.8822 | 14.0243 |
| 307 | S3_021 | ANS0017          | yu2017 | advanced | 0       | 0.02067 | 0.65502 | 0       | 0       | 4.30861  | 2.86707 | 0.59436 | 0.25694 | 0       | 0       | 0.12121 | 28.0566 | 0.07239 | 0       | 209.293 | 0       | 0       | 0.41685 | 0       |
| 308 | S3_022 | ANS0036          | yu2017 | advanced | 0       | 0.0615  | 10.8224 | 0       | 0       | 3.1699   | 0.47619 | 0.93383 | 2.90509 | 3.13842 | 0       | 187.815 | 9.9643  | 8.15993 | 0.8178  | 180.071 | 0       | 0       | 270.235 | 74.3058 |
| 309 | S3_023 | ANS0064          | yu2017 | advanced | 0.63308 | 12.5654 | 0.91121 | 7.6874  | 0.14713 | 4.27742  | 91.877  | 3.64216 | 5.46528 | 0.09887 | 0       | 26.3951 | 0.54464 | 2.54714 | 60.8362 | 158.865 | 0       | 0       | 40.733  | 24.5534 |
| 310 | S3_024 | ANS0070          | yu2017 | non_adv  | 0       | 0       | 0       | 0       | 0       | 2.40108  | 2.37698 | 0       | 0       | 35.1799 | 0       | 37.7809 | 13.5089 | 3.26599 | 13.7217 | 179.816 | 0       | 1.61905 | 65.4061 | 19.3831 |
| 311 | S3_026 | ANS1116          | yu2017 | advanced | 1.27907 | 2.19638 | 3.42067 | 0.29187 | 0       | 0.31183  | 40.7897 | 0.32598 | 0       | 0.33333 | 0       | 39.5198 | 11.0119 | 1.1229  | 1.00848 | 139.929 | 0       | 0       | 72.055  | 82.4391 |
| 312 | S3_027 | ANS1122          | yu2017 | advanced | 0       | 1.40569 | 0       | 0.70654 | 0       | 4.45807  | 7       | 0.13235 | 0.46759 | 0.21469 | 0       | 141.056 | 9.72619 | 6.85017 | 0.93079 | 209.833 | 6.71393 | 2.59073 | 331.779 | 79.0708 |
| 313 | S3_028 | ANS1131          | yu2017 | non_adv  | 0       | 0.76176 | 0       | 0.33333 | 0.02912 | 3.95269  | 16.1587 | 1.57598 | 1.66667 | 0.5226  | 0       | 163.535 | 48.0179 | 24.101  | 3.49436 | 537.363 | 0       | 8.91892 | 249.421 | 58.2465 |
| 314 | S3_029 | ANS1199          | yu2017 | advanced | 0       | 0.6124  | 0       | 0       | 0       | 2.38925  | 1.58333 | 0       | 0       | 1.01789 | 0       | 145.422 | 6.91964 | 6.95623 | 3.74859 | 140.528 | 0       | 56.9768 | 301.12  | 150.654 |
| 315 | S3_030 | ANS1224          | yu2017 | advanced | 0.03273 | 0.12403 | 0.29403 | 0       | 0.60613 | 0.09247  | 15.2937 | 2.10172 | 2.64583 | 32.5847 | 0       | 38.2832 | 0.89286 | 5.85185 | 0       | 172.536 | 0       | 0       | 55.025  | 11.6963 |
| 316 | S3_031 | ANS1461          | yu2017 | non_adv  | 0       | 40.8434 | 3.14556 | 13.0845 | 1.40307 | 3.09462  | 83.1925 | 8.03554 | 9.80324 | 4.16479 | 0       | 92.754  | 7.6012  | 1.8266  | 0.79943 | 234.407 | 0       | 5.55727 | 160.867 | 122.009 |
| 317 | S3_033 | ANS1668          | yu2017 | advanced | 0       | 0       | 0       | 0       | 0       | 10.8237  | 3.2877  | 2.7451  | 4.19213 | 0.21469 | 0       | 5.24126 | 0       | 0.71044 | 12.9859 | 504.119 | 0       | 0       | 3.76089 | 0.94101 |
| 318 | S3_034 | ANS1712          | yu2017 | advanced | 0       | 0.01964 | 0       | 0       | 0       | 9.0043   | 1.65476 | 4.66666 | 5.54861 | 68.1751 | 0       | 98.2051 | 3.86905 | 3.80808 | 4.13842 | 221.745 | 0       | 13.7117 | 111.745 | 28.1873 |
| 319 | S3_035 | ANS1714          | yu2017 | advanced | 0       | 2.91731 | 0.81223 | 3.35726 | 2.60076 | 0.84516  | 7.03571 | 1.34191 | 1.30787 | 0.0452  | 0       | 0.52448 | 0       | 0.6229  | 0.12147 | 36.5427 | 0       | 0.49678 | 0.404   | 0       |
| 320 | S3_036 | ANS1743          | yu2017 | advanced | 0       | 1.25168 | 7.73071 | 1.2488  | 0       | 0.44516  | 27.2798 | 6.9326  | 3.21065 | 0.71375 | 0       | 0.58159 | 0.10417 | 12.064  | 16.952  | 249.581 | 0       | 0       | 0.30978 | 0       |
| 321 | S3_037 | ANS1754          | yu2017 | advanced | 0.98708 | 1.04134 | 5.12809 | 0.35247 | 0       | 1.37742  | 1.18849 | 5.50858 | 3.99074 | 0.61676 | 0       | 0.97902 | 7.11012 | 1.05724 | 1.76271 | 178.893 | 0       | 0       | 0       | 0       |
| 322 | S3_038 | ANS1758          | yu2017 | non_adv  | 0       | 0.11783 | 0       | 0       | 0.08736 | 4.31076  | 6.07739 | 2.86152 | 2.84722 | 29.8154 | 4.45934 | 107.81  | 56.122  | 17.5673 | 14.8192 | 691.806 | 0       | 36.6551 | 167.096 | 32.1545 |
| 323 | S3_039 | ANS1760          | yu2017 | non_adv  | 0       | 0.87649 | 0       | 0       | 0       | 14.1194  | 2.83928 | 13.9743 | 11.8194 | 32.9473 | 0       | 45.5279 | 12.0714 | 8.53535 | 5.60734 | 206.24  | 1.72637 | 0       | 60.4061 | 22.2243 |
| 324 | S3_040 | ANS1766          | yu2017 | advanced | 0.07407 | 0.0584  | 0       | 0       | 0       | 6.15161  | 5.65476 | 0.26103 | 0.08796 | 6.12335 | 0       | 97.7587 | 19.8155 | 9.49495 | 16.5989 | 247.875 | 0.6534  | 27.8262 | 197.807 | 124.869 |
| 325 | S3_041 | ANS1813          | yu2017 | advanced | 0       | 0.87855 | 1.54003 | 2.04306 | 0       | 1.71183  | 213.486 | 13.848  | 13.2894 | 116.673 | 0       | 145.824 | 0.17262 | 0.46128 | 12.3009 | 188.68  | 0       | 0       | 290.896 | 273.388 |
| 326 | S3_043 | ANS1823          | yu2017 | CRC      | 0       | 0.17519 | 0       | 0       | 0       | 5.42151  | 2.96231 | 0.09559 | 0       | 42.3437 | 0       | 313.239 | 2.84821 | 10.1953 | 21.863  | 408.628 | 0       | 0       | 423.962 | 148.799 |
| 327 | S3_044 | ANS1832          | yu2017 | advanced | 0       | 0.32713 | 2.52111 | 0       | 0.17471 | 6.78817  | 22.9107 | 2.20466 | 2.50232 | 58.6911 | 0.63688 | 93.0058 | 20.7649 | 4.66161 | 2.88983 | 223.636 | 0       | 3.74517 | 133.547 | 28.0222 |
| 328 | S3_045 | ANS1974          | yu2017 | advanced | 0       | 0.01964 | 5.2358  | 0       | 0       | 3.20215  | 1.52778 | 1.01226 | 0.52546 | 0.55085 | 0.04467 | 39.8088 | 28.4792 | 0.33333 | 1.36582 | 212.081 | 0       | 0.27027 | 74.0314 | 72.1227 |
| 329 | S3_046 | ANS1975          | yu2017 | advanced | 0       | 0       | 0.16012 | 0.4689  | 0.56015 | 4.62473  | 1.66072 | 1.83946 | 0.26157 | 1.89077 | 0       | 119.672 | 0       | 4.87205 | 61.5099 | 323.604 | 27.8789 | 0.139   | 158.628 | 43.201  |
| 330 | S3_047 | ANS2046          | yu2017 | non_adv  | 0       | 0.08165 | 0       | 0       | 0       | 6.32366  | 2.84127 | 0       | 0.125   | 0.30132 | 0       | 74.8123 | 1.09226 | 4.96802 | 0.78955 | 59.816  | 0       | 49.9356 | 115.3   | 63.4296 |
| 331 | S3_048 | ANS2078          | yu2017 | non_adv  | 4.34539 | 0       | 9.27074 | 0       | 0       | 5.26344  | 2.44047 | 0.54044 | 0.23611 | 0.81073 | 0       | 21.7797 | 28.0327 | 4.38552 | 7.05931 | 176.097 | 12.4113 | 0       | 35.9472 | 8.72487 |
| 332 | S3_049 | ANS2136          | yu2017 | advanced | 0       | 1.32455 | 0       | 0       | 0.35939 | 2.5957   | 18.2619 | 0       | 0       | 24.177  | 0       | 179.304 | 25.9702 | 9.63804 | 1.68785 | 353.688 | 0.06468 | 1.17375 | 288.946 | 84.0804 |
| 333 | S3_050 | ANS2358          | yu2017 | advanced | 0       | 3.7137  | 0.67103 | 0.90909 | 0       | 0.24086  | 10.7004 | 12.0637 | 12.6296 | 25.8446 | 0       | 93.6351 | 2.37203 | 1.97475 | 40.5141 | 277.819 | 0       | 0.0888  | 124.6   |         |

| #   | sequer | sample_nstudy_id | group    | 370640   | 482585  | 1704941 | 2736705 | 3246804 | 1696299 | 2040133 | 2361423 | 3173495 | 181682  | 3531210 | 3976414 | 2211919 | 1804565 | 2206475 | 1559769 | 4256106 | 3611706 | 3319526 | 4171064 |         |
|-----|--------|------------------|----------|----------|---------|---------|---------|---------|---------|---------|---------|---------|---------|---------|---------|---------|---------|---------|---------|---------|---------|---------|---------|---------|
| 343 | S3_065 | M2PK149          | yu2017   | advanced | 0       | 0.32817 | 0       | 0       | 8.63333 | 4.49206 | 0       | 0       | 10.6177 | 0       | 72.409  | 2.25893 | 5.25084 | 20.2684 | 134.989 | 0.16086 | 25.1248 | 128.314 | 43.7756 |         |
| 344 | S3_066 | M2PK151          | yu2017   | advanced | 0       | 0.36899 | 0.14993 | 0.36364 | 0.13257 | 0.06129 | 0.83135 | 0.27451 | 0       | 61.4492 | 0       | 48.9347 | 40.0863 | 14.9562 | 0       | 292.967 | 0       | 0.60746 | 79.0279 | 39.1524 |
| 345 | S3_067 | A0279            | yu2017   | non_adv  | 0       | 0.02067 | 0       | 0.36364 | 0       | 5.51505 | 4.30953 | 0.27941 | 0.26389 | 80.4784 | 0       | 216.592 | 9.50596 | 10.0455 | 35.6186 | 314.367 | 0       | 71.3526 | 335.182 | 85.7079 |
| 346 | S3_068 | A0290            | yu2017   | advanced | 0       | 0.63153 | 0.10044 | 0.7177  | 0.32184 | 6.46989 | 0.84722 | 0.83333 | 0       | 0       | 0       | 20.2191 | 73.4583 | 5.31313 | 0       | 470.217 | 0       | 0.67568 | 27.3333 | 0.63386 |
| 347 | S3_069 | A0305            | yu2017   | advanced | 0       | 0.35039 | 0       | 0.66348 | 0.05824 | 4.47419 | 14.2401 | 0       | 0.08796 | 5.62053 | 0       | 100.555 | 3.65774 | 1.95623 | 5.70057 | 187.139 | 2.49337 | 18.6293 | 135.209 | 35.3619 |
| 348 | S3_070 | A0307            | yu2017   | advanced | 0       | 0.11783 | 0       | 0       | 11.7215 | 10.5298 | 1.11397 | 1.39352 | 35.322  | 0       | 155.775 | 13.1042 | 5.85017 | 10.7232 | 203.12  | 0       | 102.004 | 196.537 | 45.8444 |         |
| 349 | S3_071 | A0334            | yu2017   | advanced | 0       | 1.64703 | 0       | 0.17384 | 0       | 6.78709 | 3.0258  | 1.17402 | 0.50463 | 2.55273 | 1.29553 | 131.054 | 16.4315 | 10.7458 | 14.2698 | 224.757 | 0       | 27.9588 | 212.545 | 60.1904 |
| 350 | S3_072 | A0360            | yu2017   | advanced | 0       | 1.00569 | 0       | 0.63796 | 0.56322 | 0.67419 | 5.4623  | 0       | 0       | 21.532  | 0       | 79.1981 | 0       | 0.8771  | 6.68503 | 97.0147 | 0       | 23.5058 | 124.532 | 42.2656 |
| 351 | S3_073 | A0363            | yu2017   | advanced | 0       | 0.19948 | 0       | 0       | 0.39847 | 2.21398 | 3.60714 | 0.27941 | 0       | 17.5753 | 0       | 91.5337 | 5.32143 | 1.10438 | 12.7599 | 89.1747 | 0       | 115.96  | 127.352 | 32.3153 |
| 352 | S3_075 | A0382            | yu2017   | advanced | 0       | 0.11576 | 0.30131 | 0.54227 | 0       | 3.27097 | 0       | 0       | 0       | 0.15443 | 0       | 23.1492 | 36.0982 | 3.54545 | 11.3376 | 63.1533 | 1.63184 | 0       | 33.3762 | 15.5582 |
| 353 | S3_076 | A0385            | yu2017   | advanced | 0       | 0.17158 | 0       | 0       | 0       | 9.11076 | 0.22619 | 0       | 0       | 3.79567 | 0       | 102.927 | 0.10417 | 13.1431 | 5.22741 | 166.507 | 0       | 2.0991  | 170.512 | 46.2211 |
| 354 | S3_077 | A0387            | yu2017   | advanced | 0       | 0.20414 | 0       | 0       | 0       | 2.36559 | 12.5694 | 0       | 0       | 86.5782 | 0       | 77.8461 | 5.85119 | 4.80134 | 14.9732 | 76.4387 | 0.40216 | 11.713  | 146.798 | 36.7788 |
| 355 | S3_078 | A0390            | yu2017   | advanced | 1.56245 | 1.30336 | 0       | 0.69219 | 0       | 0.18065 | 27.377  | 0       | 0       | 4.14501 | 0       | 16.9289 | 5.81845 | 2.99158 | 0       | 104.52  | 4.42206 | 0       | 20.3155 | 2.79471 |
| 356 | S3_080 | A0045            | yu2017   | non_adv  | 0       | 2.50129 | 0.3508  | 0.25199 | 0       | 4.04731 | 16.4286 | 2.61152 | 4.13889 | 2.15612 | 0       | 105.437 | 6.46429 | 14.096  | 4.31214 | 236.761 | 0.42537 | 26.5084 | 136.069 | 27.5016 |
| 357 | S3_081 | A0043            | yu2017   | non_adv  | 0.06546 | 3.44393 | 2.66085 | 0       | 0       | 2.3172  | 0.90476 | 0       | 0.40046 | 18.4416 | 0       | 26.0093 | 0.22619 | 7.78788 | 16.8884 | 202.876 | 0.05141 | 21.4942 | 25.5653 | 4.80846 |
| 358 | S3_082 | A0085            | yu2017   | advanced | 0.61671 | 0.12662 | 0       | 0       | 0       | 6.8914  | 2.45834 | 0       | 1.57639 | 1.40207 | 0       | 21.3147 | 25.9554 | 11.3266 | 6.14548 | 165.112 | 0       | 9.35907 | 37.6403 | 19.2561 |
| 359 | S3_083 | A0088            | yu2017   | non_adv  | 0       | 1.45736 | 0       | 0.54546 | 0       | 4.23549 | 2.70432 | 1.52206 | 0.4213  | 4.98305 | 0       | 130.788 | 0.94345 | 4.75926 | 3.44351 | 80.4227 | 0       | 0.14672 | 157.679 | 35.5122 |
| 360 | S3_085 | A0133            | yu2017   | control  | 0       | 0.14987 | 0       | 0       | 0       | 3.85377 | 68.3413 | 0.27696 | 0       | 7.97175 | 0       | 29.0886 | 59.9614 | 4.0606  | 9.92937 | 549.289 | 0       | 0.17503 | 46.9101 | 5.69947 |
| 361 | S3_086 | A0134            | yu2017   | advanced | 0       | 0.27494 | 3.18631 | 0.96651 | 0.69502 | 0.7172  | 65.6151 | 0.53554 | 0       | 2.91055 | 0       | 57.9405 | 0.20833 | 13.7323 | 13.8687 | 428.485 | 0       | 0       | 69.5896 | 36.2487 |
| 362 | S3_087 | A0136            | yu2017   | advanced | 0       | 1.00775 | 0       | 0.18182 | 0       | 4.25484 | 2.59722 | 0       | 0       | 7.22599 | 0       | 127.454 | 5.12798 | 24.197  | 2.2839  | 216.271 | 0       | 10.7773 | 156.91  | 45.9037 |
| 363 | S3_088 | A0138            | yu2017   | non_adv  | 7.66667 | 0.01964 | 0       | 0       | 0       | 6.70968 | 1.63294 | 0.41912 | 0       | 53.2919 | 0       | 126.781 | 18.997  | 19.3064 | 14.7161 | 291.025 | 0       | 61.0257 | 193.656 | 50.5672 |
| 364 | S3_089 | A0163            | yu2017   | non_adv  | 0       | 0.02067 | 0       | 0       | 0       | 3.71075 | 0.66667 | 0.13971 | 0.83102 | 68.9416 | 0       | 25.5163 | 3.84524 | 6.09764 | 6.63135 | 172.683 | 0       | 35.7542 | 49.1556 | 13.8762 |
| 365 | S3_090 | A0181            | yu2017   | non_adv  | 0       | 5.38553 | 0       | 6.88198 | 0       | 1.36559 | 16.6984 | 1.11765 | 1.22917 | 14.2373 | 0       | 40.8939 | 8.72321 | 11.7525 | 5.47175 | 244.787 | 1.85655 | 2.54183 | 47.3505 | 8.55661 |
| 366 | S3_091 | A0184            | yu2017   | non_adv  | 0.03273 | 1.92042 | 0       | 0.54545 | 0       | 2.58064 | 30.1171 | 0       | 0       | 7.2618  | 0       | 30.6025 | 12.0179 | 5.8468  | 9.10876 | 283.867 | 0       | 21.1132 | 72.4533 | 57.4804 |
| 367 | S3_092 | A0206            | yu2017   | advanced | 0.39104 | 0.20207 | 0       | 1.54067 | 0.17471 | 1.28925 | 15.9365 | 0.13971 | 0.77546 | 14.1996 | 0       | 10.0559 | 0.10417 | 1.27273 | 0.39972 | 52.9307 | 0       | 0       | 20.384  | 15.2963 |
| 368 | S3_094 | A0207            | yu2017   | non_adv  | 2.70543 | 0.22739 | 2.04949 | 0       | 0       | 15.1247 | 2.39881 | 0       | 0       | 1.05461 | 0       | 42.7704 | 13.2262 | 5.52189 | 0       | 339.315 | 0       | 0       | 69.5862 | 13.7492 |
| 369 | S3_095 | A0264            | yu2017   | advanced | 0.09819 | 0.02067 | 0       | 0       | 0       | 0.57957 | 4.02778 | 0.08211 | 0       | 2.64878 | 0       | 76.0478 | 8.19048 | 35.9394 | 2.32204 | 417.803 | 0       | 0       | 145.894 | 25.654  |
| 370 | S3_096 | A0356            | yu2017   | control  | 0       | 0.12145 | 1.49345 | 0.06539 | 0       | 1.68817 | 6.70437 | 2.3701  | 2.93287 | 1.8823  | 2.21764 | 146.909 | 9.5506  | 6.8973  | 16.3616 | 155.455 | 0       | 0       | 243.298 | 63.1746 |
| 371 | S3_097 | A0272            | yu2017   | advanced | 0       | 0.20569 | 0.41776 | 0.36364 | 1.02529 | 0.63118 | 28.1766 | 0.27941 | 0       | 0.04708 | 0       | 17.3939 | 0       | 12.7071 | 0       | 210.859 | 0       | 0       | 25.763  | 13.691  |
| 372 | S3_098 | A0411            | yu2017   | advanced | 0       | 0.46777 | 0.29258 | 0.17384 | 0       | 10.9387 | 5.67262 | 2.22304 | 2.99306 | 5.38136 | 0       | 110.752 | 113.179 | 26.4411 | 0       | 339.512 | 0       | 0       | 229.761 | 231.813 |
| 373 | S3_099 | A0422            | yu2017   | advanced | 0       | 0       | 0       | 0       | 0       | 4.35376 | 1.31944 | 0.69363 | 0       | 1.5339  | 0       | 69.7785 | 6.5238  | 26.463  | 3.13136 | 31.1133 | 1.12355 | 4.4749  | 98.2755 | 21.0328 |
| 374 | S3_100 | A0427            | yu2017   | non_adv  | 0.47028 | 0       | 0.26346 | 0       | 0       | 2.14516 | 23.2678 | 0.65074 | 0.43519 | 0.37006 | 0       | 93.7121 | 13.0089 | 13.2239 | 0       | 130.697 | 2.5937  | 18.4105 | 143.666 | 39.7185 |
| 375 | S3_101 | A0431            | yu2017   | advanced | 0       | 0.50233 | 0       | 0       | 0       | 3.04516 | 0.08135 | 0       | 0.08796 | 10.3107 | 0       | 17.6958 | 20.6577 | 16.9007 | 13.9605 | 429.645 | 0       | 0       | 38.1477 | 33.9513 |
| 376 | S3_102 | A0440            | yu2017   | advanced | 0       | 1.99897 | 4.0524  | 0.72727 | 0       | 1.06774 | 13.75   | 1.52451 | 0.55324 | 128.923 | 0       | 0.4021  | 0       | 8.01178 | 0       | 150.348 | 0       | 0       | 0       | 0       |
| 377 | S3_103 | A0441            | yu2017   | non_adv  | 0       | 0       | 1.26492 | 1.34928 | 0       | 0.49032 | 4.07143 | 0.27819 | 0.37269 | 0       | 0       | 18.9953 | 0       | 0.58081 | 0       | 175.571 | 0       | 0       | 31.359  | 12.6518 |
| 378 | S3_104 | A0442            | yu2017   | advanced | 0       | 2.64961 | 7.24453 | 0       | 0.43525 | 1.28387 | 20.0516 | 0.50858 | 0.77083 | 0.40207 | 0       | 14.3392 | 0       | 1.26936 | 10.8079 | 206.039 | 0       | 0       | 29.1313 | 24.4635 |
| 379 | S3_105 | A0447            | yu2017   | advanced | 0.15935 | 0       | 0       | 0       | 0       | 0.34839 | 5.00794 | 0.82598 | 1.18287 | 7.73352 | 0       | 69.3391 | 26.9137 | 14.7205 | 13.2853 | 540.333 | 1.79934 | 0       | 114.214 | 23.3598 |
| 380 | S3_106 | M2PK114          | yu2017   | advanced | 0       | 0       | 0       | 0       | 0       | 9.64086 | 3.26786 | 3.38358 | 2.21296 | 9.11111 | 0       | 164.179 | 30.0149 | 14.9613 | 4.78814 | 331.591 | 1.57794 | 6.30631 | 211.118 | 49.9566 |
| 381 | S3_107 | M2PK155          | yu2017   | advanced | 0.03445 | 5.12972 | 6.21979 | 0.66188 | 0.34253 | 1.37312 | 7.59326 | 0.9424  | 1.46759 | 16.6704 | 0       | 76.5815 | 30.2232 | 9.89899 | 0       | 398.448 | 0       | 0       | 111.339 | 43.1883 |
| 382 | S3_108 | M2PK074          | yu2017   | advanced | 0.19638 | 0.03204 | 0       | 0       | 0       | 8.02796 | 5.08928 | 5.16912 | 4.97222 | 30.42   | 0       | 55.8939 | 27.0536 | 7.92592 | 4.50141 | 331.205 | 0       | 16.6229 | 54.9236 | 18.6085 |
| 383 | S3_109 | M2PK095          | yu2017   | advanced | 0.37726 | 0.04806 | 0       | 0       | 0       | 5.04086 | 5.25397 | 0       | 0       | 4.95104 | 0       | 67.0699 | 48.128  | 26.0774 | 15.7415 | 378.252 | 0.18823 | 13.1866 | 128.634 | 80.4719 |
| 384 | S3_110 | M2PK096          | yu2017   | advanced | 0       | 0.03463 | 0       | 0.88198 | 1.27586 | 1.34516 | 3.04167 | 0.39706 | 1.62268 | 0.38701 | 0       | 42.9813 | 0.15476 | 17.8266 | 8.47175 | 234.629 | 0       | 0       | 89.11   | 35.3502 |
| 385 | S3_111 | M2PK101          | yu2017   | non_adv  | 0       | 0.15401 | 0       | 0       | 0       | 14.2925 | 4.57738 | 14.9976 | 11.6898 | 11.5    | 0       | 70.7855 | 37.1815 | 7.36868 | 2.00565 | 370.483 | 0.46932 | 0       | 90.35   | 27.7883 |
| 386 | S3_112 | M2PK149          | yu2017   | advanced | 3.54867 | 2.38139 | 0       | 0.89314 | 0       | 5.38495 | 13.7262 | 0.89093 | 0.72222 | 0       | 0       | 3.29254 | 6.30359 | 4.06902 | 0       | 628.359 | 0       | 0.42729 | 5.29765 | 2.76613 |
| 387 | S3_113 | M2PK113          | yu2017   | advanced | 0       | 6.39431 | 0       | 0.51675 | 0       | 1.11505 | 53.4921 | 0.93382 | 1.53241 | 0.56403 | 0       | 102.318 | 0       | 2.22054 | 0.87429 | 307.785 | 0       | 0       | 142.525 | 29.2275 |
| 388 | S4_001 | ANS0015/yu2017   | non_adv  | 0        | 0       | 13.0087 | 0       | 0       | 0       | 4.02903 | 4.23612 | 0.81005 | 0       | 8.41714 | 0       | 3.23193 | 1.53274 | 0.47811 | 1.15819 | 49.8133 | 0       | 0.05148 | 6.803   | 1.66772 |
| 389 | S4_002 | ANS0017/yu2017   | advanced | 0        | 0.02067 | 0.32605 | 0.26954 | 0.16935 | 1.70108 | 38.1806 | 0       | 0       | 0.07721 | 0       | 4.76107 | 6.05059 | 0.76263 | 0       | 45.6507 | 0       | 0       | 10.9743 | 14.5894 |         |
| 390 | S4_003 | ANS0036/yu2017   | advanced | 0        | 0.1168  | 1.08588 | 0       | 0       | 0.4957  | 0.22619 | 0       | 0       | 0.34181 | 0       | 63.1165 | 5.24405 | 2.47475 | 0.40819 | 58.7    |         |         |         |         |         |

| #   | sequer | sample  | nstudy_id | group    | 370640  | 482585  | 1704941 | 2736705 | 3246804 | 1696299  | 2040133 | 2361423 | 3173495 | 181682  | 3531210 | 3976414 | 2211919 | 1804565 | 2206475 | 1559769 | 4256106 | 3611706 | 3319526 | 4171064 |
|-----|--------|---------|-----------|----------|---------|---------|---------|---------|---------|----------|---------|---------|---------|---------|---------|---------|---------|---------|---------|---------|---------|---------|---------|---------|
| 400 | S4_014 | ANS1565 | /yu2017   | advanced | 0       | 0.18966 | 1.89811 | 0       | 0       | 0.102903 | 28.9603 | 0.23775 | 0.66435 | 52.5706 | 0       | 3.39277 | 8.33631 | 1.11111 | 1.66102 | 75.8014 | 0       | 0       | 10.8251 | 14.5492 |
| 401 | S4_015 | ANS1565 | (yu2017   | advanced | 0       | 0.31731 | 0.96361 | 0       | 0       | 3.00538  | 39.9385 | 1.50122 | 0.44213 | 0       | 0       | 25.338  | 10.9762 | 0.51684 | 0.23305 | 66.5547 | 0       | 0       | 44.7787 | 55.2624 |
| 402 | S4_017 | ANS1712 | /yu2017   | advanced | 53.0991 | 1.04548 | 0       | 0.69537 | 0       | 0.17527  | 2.61508 | 1.24142 | 1.55324 | 1.05932 | 0       | 222.762 | 0.44345 | 4.37374 | 0.16102 | 17.0973 | 0       | 5.27284 | 340.336 | 82.8518 |
| 403 | S4_018 | ANS1742 | /yu2017   | advanced | 191.298 | 0.37829 | 0       | 1.17065 | 0.44751 | 0        | 8.81746 | 0.23284 | 0       | 0       | 0       | 10.3403 | 31.1518 | 7.98821 | 0       | 82.9293 | 0       | 0       | 1.3626  | 1.59682 |
| 404 | S4_019 | ANS1743 | /yu2017   | advanced | 0       | 0.63773 | 4.17758 | 0.14354 | 0       | 0.38925  | 0       | 2.46446 | 1.34954 | 0       | 0       | 0.8683  | 0       | 0.38721 | 0       | 24.2227 | 0       | 0       | 0.04568 | 0       |
| 405 | S4_020 | ANS1744 | /yu2017   | advanced | 0       | 2.47184 | 0.60262 | 4.27911 | 0.69502 | 0.27527  | 13.6726 | 0.41544 | 0.26389 | 0       | 0       | 68.0792 | 0.10417 | 6.28788 | 0       | 10.0307 | 0       | 0       | 115.12  | 41.0465 |
| 406 | S4_021 | ANS1746 | /yu2017   | advanced | 0       | 0.14677 | 0       | 0.5311  | 0.34943 | 0        | 2.47223 | 0       | 0       | 0       | 0       | 9.25291 | 0       | 2.20707 | 33.411  | 23.0373 | 0       | 3.31917 | 28.0792 | 12.9132 |
| 407 | S4_022 | ANS1756 | /yu2017   | non_adv  | 0       | 458.438 | 0       | 117.86  | 94.7372 | 25.6161  | 0.67262 | 0       | 0       | 0.98211 | 0       | 2.62471 | 50.6667 | 1.04714 | 0       | 1268.89 | 0       | 0       | 0.50821 | 0       |
| 408 | S4_023 | ANS1758 | (yu2017   | non_adv  | 0       | 0.52661 | 0.24891 | 0       | 0       | 0.15807  | 20.8313 | 0       | 0.51389 | 0.72693 | 15.6105 | 19.4301 | 9.29763 | 2.57744 | 14.3573 | 98.7907 | 0       | 16.6667 | 38.7052 | 7.01587 |
| 409 | S4_025 | ANS1760 | /yu2017   | non_adv  | 0       | 2.95711 | 0       | 0       | 0       | 2.01828  | 1.75992 | 0       | 0.5162  | 11.3362 | 0       | 55.187  | 5.72024 | 5.51683 | 8.13277 | 90.8387 | 0.56053 | 75.758  | 97.5746 | 31.7873 |
| 410 | S4_026 | ANS1766 | /yu2017   | advanced | 0       | 0.59845 | 0       | 0       | 0       | 2.66022  | 0.89881 | 0       | 0       | 0.14689 | 0       | 64.4825 | 0.52679 | 6.05219 | 1.83192 | 88.6347 | 0.70813 | 2.5251  | 104.425 | 42.3238 |
| 411 | S4_027 | ANS1779 | /yu2017   | non_adv  | 0       | 0.47597 | 0       | 0       | 0       | 4.30215  | 6.17857 | 0.40564 | 1.15972 | 4.06968 | 0       | 262.137 | 8.19047 | 20.3788 | 12.2486 | 311.389 | 0       | 64.0489 | 426.071 | 315.264 |
| 412 | S4_028 | ANS1779 | (yu2017   | non_adv  | 0       | 0.40569 | 0       | 0       | 0       | 2.41505  | 1.26389 | 0       | 0       | 8.46893 | 0       | 68.9091 | 4.20833 | 4.12795 | 4.01695 | 66.7453 | 0       | 51.8957 | 112.639 | 58.0243 |
| 413 | S4_029 | ANS1780 | /yu2017   | non_adv  | 0       | 0.43566 | 0.46871 | 0       | 0       | 1.43441  | 2.79762 | 0.13971 | 0.26389 | 0.53861 | 0       | 34.4953 | 3.77976 | 11.5606 | 1.20763 | 104.727 | 0       | 1.79408 | 55.6117 | 12.9915 |
| 414 | S4_031 | ANS1782 | /yu2017   | advanced | 0       | 0       | 2.39738 | 0       | 0       | 0.36129  | 15.7718 | 0       | 0       | 0       | 0       | 0       | 0       | 0       | 0       | 23.12   | 0       | 0       | 0       | 0       |
| 415 | S4_032 | ANS1784 | /yu2017   | advanced | 4.96038 | 6.98347 | 0       | 0.88995 | 0       | 1.14086  | 0       | 0       | 0       | 0.38136 | 0       | 49.6655 | 15.7173 | 3.64141 | 7.62288 | 139.403 | 0       | 0       | 98.5368 | 39.4497 |
| 416 | S4_033 | ANS1787 | /yu2017   | advanced | 0       | 0.11576 | 0.42649 | 0       | 0       | 0.5957   | 1.03968 | 0       | 0       | 5.45668 | 0       | 80.1177 | 2.29762 | 6.02357 | 6.10735 | 97.7427 | 0       | 0       | 167.484 | 54.3947 |
| 417 | S4_034 | ANS1796 | /yu2017   | advanced | 0       | 0.20465 | 24.3246 | 3.32536 | 0       | 3.6742   | 0       | 0       | 0       | 0       | 0       | 12.0221 | 2.72024 | 0       | 0       | 7.96133 | 0       | 0       | 18.4654 | 14.019  |
| 418 | S4_035 | ANS1813 | /yu2017   | advanced | 0       | 3.6615  | 0       | 1.59171 | 1.17778 | 0.54946  | 4.08929 | 4.81863 | 6.08564 | 1.97269 | 0       | 0       | 4.4881  | 0.21549 | 0       | 0       | 0       | 69.045  | 0.16274 | 0       |
| 419 | S4_037 | ANS1876 | /yu2017   | advanced | 0       | 0.32662 | 0.51965 | 0.18182 | 0.34789 | 0.24516  | 8.73214 | 0.26226 | 0.35648 | 10.209  | 0       | 74.0466 | 11.4166 | 7.26936 | 1.92797 | 90.204  | 1.61775 | 0       | 136.729 | 61.4518 |
| 420 | S4_038 | ANS1975 | (yu2017   | advanced | 0       | 0       | 2.08879 | 0       | 0       | 1.13011  | 0       | 0.47917 | 0.52083 | 0       | 0       | 17.8799 | 2.30059 | 0.58586 | 2.08757 | 37.2053 | 6.28524 | 0       | 22.0621 | 3.02645 |
| 421 | S4_040 | ANS2093 | /yu2017   | advanced | 0       | 3.10388 | 0.61135 | 0       | 0       | 0.63011  | 15.6012 | 0       | 0       | 1.06121 | 0       | 36.4207 | 0       | 0.867   | 9.36158 | 39.0693 | 0       | 0       | 83.5946 | 53.8571 |
| 422 | S4_041 | ANS2094 | /yu2017   | non_adv  | 0       | 0       | 0.74818 | 0.36045 | 2.21686 | 0.50215  | 0       | 0       | 0       | 0       | 0       | 3.2634  | 0       | 0.43603 | 0       | 15.352  | 0       | 4.93179 | 0.50678 | 0.06561 |
| 423 | S4_042 | ANS2111 | /yu2017   | advanced | 0       | 0.79949 | 0       | 0       | 0       | 2.9871   | 4.52778 | 0       | 0       | 89.4284 | 0       | 26.2016 | 7.14882 | 2.40067 | 3.10593 | 27.5347 | 0       | 0.12741 | 55.0214 | 35.8667 |
| 424 | S4_043 | ANS2134 | /yu2017   | advanced | 0       | 0.31835 | 0       | 0       | 0       | 1.92258  | 1.73214 | 0.36765 | 0.26389 | 0.07721 | 0       | 15.7051 | 6.20535 | 1.31482 | 0       | 42.3427 | 0       | 2.80438 | 31.4333 | 32.3989 |
| 425 | S4_044 | ANS2136 | /yu2017   | advanced | 0       | 0.83256 | 0.68559 | 0       | 0       | 0.56022  | 20.9702 | 0.13603 | 0.15046 | 8.72599 | 0       | 98.6433 | 2.5625  | 3.88215 | 2.45339 | 50.7413 | 0       | 20.5637 | 164.924 | 40.9968 |
| 426 | S4_045 | ANS2140 | /yu2017   | advanced | 0       | 0.22739 | 1.29549 | 0       | 0       | 9.46775  | 11.8909 | 0       | 0       | 9.99529 | 0       | 51.0979 | 39.3303 | 8.65488 | 3.76413 | 144.772 | 1.19652 | 0       | 77.2705 | 31.7968 |
| 427 | S4_046 | ANS2254 | f(yu2017  | non_adv  | 0.28252 | 0.16537 | 0       | 0       | 0       | 2.08172  | 30.7857 | 0.53677 | 0.26389 | 0.58475 | 0       | 19.2086 | 3.50298 | 4.89057 | 3.01272 | 113.589 | 0       | 0       | 24.4818 | 6.04656 |
| 428 | S4_047 | ANS2406 | /yu2017   | advanced | 0       | 0.04134 | 0.65648 | 0       | 0       | 1.63871  | 28.3929 | 0.27083 | 0       | 0.30509 | 0       | 102.618 | 20.2857 | 5.72222 | 56.4477 | 208.5   | 0       | 43.3076 | 121.664 | 41.8889 |
| 429 | S4_048 | ANS2407 | /yu2017   | non_adv  | 0       | 0.01602 | 0       | 0       | 0       | 0.91398  | 9.83532 | 0       | 0       | 5.10264 | 0.78007 | 33.9475 | 6.41072 | 3.26768 | 3.80226 | 45.1373 | 0       | 0       | 50.9322 | 21.8032 |
| 430 | S4_049 | ANS2408 | /yu2017   | advanced | 2.323   | 0.34935 | 7.08297 | 0       | 0.17471 | 2.26022  | 18.8095 | 0.21691 | 0       | 0.41337 | 0       | 51.5827 | 0.33929 | 1.51178 | 0.4774  | 47.2547 | 0       | 43.8069 | 79.8108 | 21.509  |
| 431 | S4_050 | ANS2454 | /yu2017   | advanced | 0       | 0.08631 | 0.30277 | 0       | 0       | 0.36344  | 6.69247 | 0.54534 | 0.5162  | 24.7618 | 0       | 86.3321 | 0.3125  | 6.80976 | 4.51978 | 70.544  | 0       | 1.19176 | 137.584 | 45.4709 |
| 432 | S4_051 | ANS2464 | /yu2017   | non_adv  | 0       | 0.34315 | 13.5706 | 0       | 0       | 1.63011  | 0.66667 | 0       | 0       | 13.5565 | 0       | 11.7669 | 3.78869 | 2.50505 | 0.30509 | 23.0147 | 0       | 0       | 22.8858 | 7.63492 |
| 433 | S4_052 | ANS2491 | /yu2017   | non_adv  | 0       | 0.43566 | 0       | 0.18182 | 0       | 0.97097  | 0       | 0.32843 | 0.16667 | 9.76083 | 0       | 59.6025 | 3.11904 | 1.3771  | 1.2387  | 38.26   | 0       | 1.7722  | 62.2205 | 18.001  |
| 434 | S4_053 | ANS2508 | /yu2017   | advanced | 0       | 0.27597 | 0       | 0.18182 | 0       | 0.25591  | 1.19048 | 0       | 0       | 6.04238 | 0       | 52.7098 | 1.36012 | 0.06397 | 0.49153 | 67.168  | 8.71143 | 0       | 98.7416 | 77.0835 |
| 435 | S4_054 | ANS2530 | /yu2017   | advanced | 0       | 0.11783 | 0.17904 | 0.54227 | 0.52261 | 0.57634  | 14.6885 | 0.47917 | 1.04167 | 11.548  | 0       | 90.4498 | 2.40477 | 17.1515 | 1.02119 | 216.343 | 0       | 1.86615 | 108.961 | 22.545  |
| 436 | S5_002 | ANS1562 | yu2017    | CRC      | 0       | 0       | 0       | 0       | 0       | 0.8086   | 0.43651 | 0.27328 | 0       | 56.5866 | 0       | 187.667 | 4.32143 | 6.78956 | 8.68362 | 69.0387 | 0       | 0       | 249.967 | 64.9354 |
| 437 | S5_003 | ANS1673 | yu2017    | CRC      | 0       | 0.32713 | 0.75983 | 0.36045 | 1.03525 | 0.07097  | 12.0258 | 2.57966 | 1.75926 | 10.9115 | 0       | 59.782  | 0.87798 | 0.27273 | 0       | 43.6147 | 0       | 4.11969 | 101.692 | 45.5365 |
| 438 | S5_006 | ANS1713 | yu2017    | CRC      | 0       | 0.73643 | 0.6361  | 0.6874  | 0.55632 | 0.21075  | 19.0337 | 0.62623 | 0.69907 | 0.09887 | 0       | 75.937  | 10.9673 | 0.10101 | 0       | 51.2893 | 0       | 0       | 164.917 | 135.149 |
| 439 | S5_007 | ANS1716 | yu2017    | CRC      | 0       | 0.38501 | 0       | 0       | 0       | 9.89248  | 12.7421 | 3.89706 | 7.48148 | 0.1064  | 0       | 99.0035 | 10.1548 | 7.06902 | 3.70057 | 137.032 | 0.88806 | 7.45431 | 138.43  | 7.16084 |
| 440 | S5_008 | ANS1717 | yu2017    | CRC      | 0       | 7.91834 | 19.9345 | 12.2408 | 0       | 0.77097  | 20.3393 | 0.27574 | 0       | 0       | 0       | 3.11189 | 0.625   | 4.36869 | 0       | 55.6867 | 15.3292 | 0       | 3.42898 | 0.36402 |
| 441 | S5_009 | ANS1721 | yu2017    | CRC      | 0       | 0.33644 | 0       | 0.88357 | 0       | 0.7957   | 0.12302 | 0.25735 | 0       | 12.6092 | 0       | 100.471 | 1.12798 | 2.39562 | 2.57627 | 56.9613 | 0       | 0       | 155.946 | 30.8275 |
| 442 | S5_010 | ANS1723 | yu2017    | CRC      | 0.03531 | 0.82067 | 2.41048 | 0       | 0       | 6.38925  | 3.62698 | 34.7353 | 30.331  | 2.48964 | 0       | 63.5932 | 0.75    | 3.00505 | 0.70056 | 39.7907 | 0       | 10.193  | 89.7095 | 22.528  |
| 443 | S5_011 | ANS1726 | yu2017    | CRC      | 0       | 0       | 3.13974 | 0.88198 | 0       | 2.88387  | 11.377  | 10.3358 | 12.4005 | 0.84652 | 0.04467 | 76.0454 | 15.9048 | 1.27609 | 2.39689 | 32.2413 | 0       | 0.20335 | 156.552 | 37.9291 |
| 444 | S5_012 | ANS1730 | yu2017    | CRC      | 0       | 1.37726 | 0.87627 | 0       | 0       | 8.06129  | 3.91865 | 168.82  | 149.146 | 1.32863 | 0       | 51.2704 | 0       | 5.68518 | 0.51836 | 50.256  | 0       | 3.46203 | 63.833  | 12.5577 |
| 445 | S5_013 | ANS1735 | yu2017    | CRC      | 6.46942 | 3.17933 | 0       | 10.1898 | 0       | 1.56989  | 17.5833 | 0.90931 | 0.9213  | 0.34558 | 3.73768 | 30.2797 | 1.64286 | 3.07407 | 0.22175 | 75.9813 | 0       | 0.11326 | 36.8066 | 6.09418 |
| 446 | S5_014 | ANS1753 | yu2017    | CRC      | 0.22567 | 0       | 0       | 0       | 0       | 2.33441  | 0.90476 | 0.13603 | 0.25    | 2.11299 | 0       | 198.841 | 1.3631  | 3.21212 | 5.56497 | 42.8853 | 0       | 42.6654 | 281.475 | 60.4889 |
| 447 | S5_015 | ANS1765 | yu2017    | CRC      | 0       | 0.81395 | 0       | 0.89793 | 0       | 1.35484  | 1.97024 | 0       | 0       | 2.48682 | 0       | 52.0291 | 0.84821 | 1.59427 | 1.97175 | 33.988  | 0       | 2.42471 | 117.061 | 24.8    |
| 448 | S5_016 | ANS1794 | yu2017    | CRC      | 0       | 0.23411 | 0       | 0.18182 | 0       | 0.45592  | 1.2361  |         |         |         |         |         |         |         |         |         |         |         |         |         |







| #   | sequer | sample_n | study_id  | group   | 370640  | 482585  | 1704941 | 2736705 | 3246804 | 1696299 | 2040133 | 2361423 | 3173495 | 181682  | 3531210 | 3976414 | 2211919 | 1804565 | 2206475 | 1559769 | 4256106 | 3611706 | 3319526 | 4171064 |         |
|-----|--------|----------|-----------|---------|---------|---------|---------|---------|---------|---------|---------|---------|---------|---------|---------|---------|---------|---------|---------|---------|---------|---------|---------|---------|---------|
| 571 | ANS122 | ANS1222  | yu2015_16 | control | 0       | 0       | 0       | 0.95215 | 0       | 0.2828  | 5.38492 | 0.20343 | 0.18287 | 7.29661 | 0       | 53.5512 | 0.91964 | 4.47138 | 0.58757 | 14.2493 | 0.22554 | 0       | 102.39  | 13.7439 |         |
| 572 | ANS145 | ANS1454  | yu2015_16 | control | 0       | 0.07494 | 0       | 0       | 0       | 0.60968 | 1.9127  | 0       | 0       | 0.45386 | 2.59565 | 5.47319 | 3.5625  | 2.12795 | 6.43926 | 13.4187 | 0       | 1.04376 | 6.90007 | 1.87831 |         |
| 573 | ANS145 | ANS1456  | yu2015_16 | control | 0       | 0.19483 | 0       | 0       | 0.2705  | 0       | 2.79365 | 0.67402 | 0.89583 | 2.10452 | 0       | 9.98135 | 6.46131 | 0.89562 | 0.50141 | 32.9933 | 3.65672 | 0       | 10.6381 | 2.23915 |         |
| 574 | ANS147 | ANS1475  | yu2015_16 | control | 0       | 0       | 0       | 0       | 0       | 1.15161 | 2.20635 | 0.38603 | 0       | 0.81827 | 0       | 69.0513 | 6.16667 | 3.00842 | 1.72317 | 18.6613 | 0.75042 | 0       | 116.335 | 34.2836 |         |
| 575 | ANS16  | ANS16    | yu2015_16 | control | 0       | 0.12093 | 0       | 1.15949 | 5.6774  | 0.09462 | 8.99008 | 0.57598 | 0       | 0.19115 | 0       | 3.72028 | 4.56548 | 4.42761 | 0.37571 | 24.2947 | 0.06634 | 0       | 6.18629 | 7.41482 |         |
| 576 | ANS19  | ANS19    | yu2015_16 | control | 0.06718 | 0       | 2.04076 | 0       | 0       | 0.72151 | 4.05953 | 5.85907 | 5.0162  | 2.99812 | 0       | 10.3496 | 22.0982 | 2.5     | 0.55367 | 134.909 | 0       | 0       | 7.00714 | 1.78836 |         |
| 577 | ANS23  | ANS23    | yu2015_16 | control | 0.38157 | 0.18295 | 0       | 0       | 0       | 0.93656 | 1.60317 | 0       | 0       | 0.51852 | 0.1855  | 0       | 9.04661 | 4.25595 | 1.42424 | 22.1751 | 32.8653 | 0.03317 | 8.83655 | 22.1513 | 8.23916 |
| 578 | ANS27  | ANS27    | yu2015_16 | control | 0.12489 | 0.97106 | 0       | 0.18022 | 0.29809 | 5.07635 | 2.27183 | 0       | 0       | 0.48117 | 0       | 9.48368 | 4.47024 | 7.24075 | 1.3178  | 14.2987 | 0       | 3.56242 | 16.8273 | 10.0825 |         |
| 579 | ANS3   | ANS3     | yu2015_16 | control | 0       | 1.08786 | 0.11645 | 0       | 0       | 0.96559 | 13.6905 | 0.96814 | 1.96528 | 1.76271 | 0       | 10.3089 | 16.4256 | 6.61111 | 0.89548 | 105.053 | 0       | 0       | 21.6538 | 9.82539 |         |
| 580 | ANS30  | ANS30    | yu2015_16 | control | 0       | 9.20775 | 0       | 1.48963 | 1.69962 | 0.33333 | 56.3651 | 0.09804 | 0.18519 | 3.41714 | 0       | 7.18531 | 1.87202 | 2.65657 | 1.39548 | 20.612  | 0       | 0       | 9.48537 | 3.58942 |         |
| 581 | ANS31  | ANS31    | yu2015_16 | control | 0       | 0       | 0       | 0       | 0.02835 | 0.44516 | 90.6687 | 1.16177 | 1.41898 | 0       | 0       | 12.2144 | 3.52678 | 3.77441 | 7.3065  | 13.36   | 0       | 34.2908 | 12.0343 | 1.6836  |         |
| 582 | ANS46  | ANS46    | yu2015_16 | control | 0       | 0.26202 | 0       | 0       | 0       | 1.6     | 9.85118 | 0.09681 | 0.12732 | 2.21187 | 0       | 12.1818 | 1.2381  | 0.38047 | 0       | 18.6213 | 0.75042 | 3.70141 | 21.5189 | 2.42751 |         |
| 583 | ANS49  | ANS49    | yu2015_16 | control | 0       | 0.40517 | 0       | 0       | 0       | 0.48602 | 30.5258 | 0.84069 | 0.18519 | 2.74576 | 0       | 28.3764 | 2.27976 | 9.23064 | 3.55367 | 174.504 | 0       | 0       | 19.2113 | 2.69841 |         |
| 584 | ANS52  | ANS52    | yu2015_16 | control | 0       | 0.1447  | 0       | 1.51515 | 0       | 2.99892 | 35.7699 | 0.51716 | 1.2037  | 4.69774 | 0       | 4.18298 | 3.57738 | 1.3064  | 0.22175 | 43.792  | 0.13101 | 0.24968 | 6.99072 | 2.70053 |         |
| 585 | ANS7   | ANS7     | yu2015_16 | control | 0       | 48.0238 | 0       | 8.36363 | 2.88812 | 0.20108 | 103.441 | 0.1924  | 0.28241 | 0.14689 | 0       | 17.4429 | 0.73512 | 1.59259 | 1.64548 | 61.2333 | 0.19652 | 0       | 33.4375 | 5.19153 |         |
| 586 | ANS71  | ANS71    | yu2015_16 | control | 0       | 0.15297 | 0       | 0.49123 | 0       | 0.64194 | 3.50595 | 0.36397 | 0.67361 | 1.3371  | 0       | 81.4323 | 12.4911 | 34.9815 | 2.64125 | 71.8173 | 2.47015 | 8.91891 | 93.7309 | 12.945  |         |
| 587 | ANS78  | ANS78    | yu2015_16 | control | 0       | 0.42842 | 0       | 0.1244  | 0.059   | 5.35914 | 2.25595 | 0       | 0       | 0.29849 | 0       | 15.613  | 3.11012 | 0.30976 | 4.3404  | 14.328  | 0       | 0       | 25.5989 | 3.44233 |         |
| 588 | ANS85  | ANS85    | yu2015_16 | control | 0       | 1.48527 | 0       | 0       | 0.35326 | 0.3172  | 2.65079 | 0       | 0.3588  | 0.94821 | 0       | 25.8368 | 2.52083 | 4.32828 | 11.1963 | 31.2093 | 0.76368 | 0.27542 | 47.157  | 18.5005 |         |
| 589 | ANS97  | ANS97    | yu2015_16 | control | 0       | 1.55194 | 0       | 0.12281 | 0       | 1.78065 | 20.4266 | 0       | 0       | 0       | 0       | 13.0152 | 0.57738 | 1.3064  | 17.2302 | 39.8413 | 0       | 3.27027 | 20.6117 | 5.12063 |         |
