# Supplementary material for: A novel faecal Lachnoclostridium marker for the non-invasive diagnosis of colorectal adenoma and cancer
Source: PubMed Central journal article supplement — Gut. 2019 Nov 27;69(7):1248–57. doi: 10.1136/gutjnl-2019-318532 (PMC7306980; doi:10.1136/gutjnl-2019-318532), 2019-11-27
Supplement: gutjnl-2019-318532supp003.pdf [file gutjnl-2019-318532supp003.pdf]

Supplementary Table 2. Clinical characteristics of healthy subjects and colorectal adenoma/cancer patients

| Variables | Group I - Hong Kong |                    |                |                    | Hong Kong (subset with FIT) |                    |                |                    | Group II - Shanghai |                    |               |                    |
|-----------|---------------------|--------------------|----------------|--------------------|-----------------------------|--------------------|----------------|--------------------|---------------------|--------------------|---------------|--------------------|
|           | Control<br>(n=288)  | Adenoma<br>(n=207) | CRC<br>(n=203) | <i>P</i><br>value* | Control<br>(n=260)          | Adenoma<br>(n=204) | CRC<br>(n=178) | <i>P</i><br>value* | Control<br>(n=97)   | Adenoma<br>(n=145) | CRC<br>(n=71) | <i>P</i><br>value* |
| Age       | 59.5±5.9            | 60.8±6.1           | 67.3±11.3      | <0.001             | 59.4±5.4                    | 60.8±6.2           | 66.9±11.1      | <0.001             | 57.3±11.1           | 60.7±10.6          | 64.2±10.0     | <0.001             |
| Gender    |                     |                    |                |                    |                             |                    |                |                    |                     |                    |               |                    |
| Male      | 115<br>(39.9%)      | 118<br>(57.0%)     | 124<br>(61.1%) | 0.0008             | 102<br>(39.2%)              | 116<br>(56.9%)     | 111<br>(62.4%) | <0.001             | 39<br>(39.8%)       | 87<br>(60.0%)      | 44<br>(62.0%) | 0.017              |
| Female    | 173<br>(60.1%)      | 89<br>(43.0%)      | 79<br>(38.9%)  |                    | 158<br>(60.8%)              | 88<br>(43.1%)      | 67<br>(37.6%)  |                    | 58<br>(59.2%)       | 58<br>(40.0%)      | 27<br>(38.0%) |                    |
| Location  |                     |                    |                |                    |                             |                    |                |                    |                     |                    |               |                    |
| Proximal  |                     | 63<br>(30.4%)      | 54<br>(26.6%)  |                    |                             | 62<br>(30.4%)      | 46<br>(25.8%)  |                    |                     | 46<br>(31.7%)      | 18<br>(25.4%) |                    |
| Distal    |                     | 87<br>(42.0%)      | 149<br>(73.4%) |                    |                             | 86<br>(42.2%)      | 132<br>(74.2%) |                    |                     | 95<br>(65.5%)      | 53<br>(74.6%) |                    |
| both      |                     | 57<br>(27.5%)      | 0 (0%)         |                    |                             | 56<br>(27.4%)      | 0 (0%)         |                    |                     | 4 (2.8%)           | 0 (0%)        |                    |
| TNM stage |                     |                    |                |                    |                             |                    |                |                    |                     |                    |               |                    |
| I         |                     |                    | 30<br>(14.8%)  |                    |                             |                    | 27<br>(15.2%)  |                    |                     |                    | 7<br>(9.9%)   |                    |

|                |  |                |               |  |  |  |                |  |  |  |               |  |
|----------------|--|----------------|---------------|--|--|--|----------------|--|--|--|---------------|--|
| II             |  |                | 66<br>(32.5%) |  |  |  | 52<br>(29.2%)  |  |  |  | 30<br>(42.3%) |  |
| III            |  |                | 72<br>(35.5%) |  |  |  | 66<br>(37.1%)  |  |  |  | 24<br>(33.8%) |  |
| IV             |  |                | 35<br>(17.2%) |  |  |  | 33<br>(18.5%)  |  |  |  | 10<br>(14.1%) |  |
| <b>Adenoma</b> |  |                |               |  |  |  |                |  |  |  |               |  |
| Non-advanced   |  | 87<br>(42.0%)  |               |  |  |  | 86<br>(42.2%)  |  |  |  | 54<br>(55.1%) |  |
| Advanced       |  | 120<br>(58.0%) |               |  |  |  | 118<br>(57.8%) |  |  |  | 44<br>(44.9%) |  |

Notes: CRC, colorectal cancer; FIT, fecal immunochemical test; TNM, tumor-node-metastasis.

\*Gender by Chi-square; Age by one-way ANOVA.
